# Supplementary material for: Sugar-modified G-quadruplexes: effects of LNA-, 2′F-RNA– and 2′F-ANA-guanosine chemistries on G-quadruplex structure and stability
Source: PubMed Central journal article supplement (PMC3973314; doi:10.1093/nar/gkt1312), 2013-12-25
Supplement: supp_gkt1312_Supplementary_Data.pdf [file supp_gkt1312_Supplementary_Data.pdf]

# **Sugar-modified G-quadruplexes: Effects of LNA-, 2'-F-RNA- and 2'-F-ANA-guanosine chemistries on G-quadruplex structure and stability**

**Zhe Li<sup>‡</sup>, Christopher Jacques Lech<sup>‡</sup> and Anh Tuân Phan\***

School of Physical and Mathematical Sciences,  
Nanyang Technological University, Singapore 637371

## **SUPPLEMENTARY DATA**

\*Corresponding author: [phantuan@ntu.edu.sg](mailto:phantuan@ntu.edu.sg)

<sup>‡</sup>These authors contributed equally to this work.

Running title: LNA, 2'-F- guanosine and 2'-F-ANA-guanosine modifications to G-quadruplexes

Key words: G-quadruplex, LNA-guanosine, 2'-F- guanosine, 2'-F-ANA-guanosine

## SUPPORTING INFORMATION CONTENTS

### *Locked Nucleic Acid modified guanosines*

#### **Table S1** – Thermodynamic Parameters of LNA-modified G-quadruplex

- Fig S1** – <sup>1</sup>H NMR imino proton spectra of (4+0) G-quadruplex-forming PS-series sequences
- Fig S2** – <sup>1</sup>H NMR imino proton spectra of (3+1) G-quadruplex-forming HT-series sequences
- Fig S3** – CD spectra of the (4+0) G-quadruplex-forming PS-series sequences
- Fig S4** – CD spectra of the (3+1) G-quadruplex-forming HT-series sequences
- Fig S5** – CD melting (4+0) G-quadruplex-forming PS-series sequences
- Fig S6** – Fraction Folded CD melting (4+0) G-quadruplex-forming PS-series sequences
- Fig S7** – UV melting (3+1) G-quadruplex-forming H-series sequences
- Fig S8** – Fraction Folded UV melting (3+1) G-quadruplex-forming H-series sequences

### *2'-F-guanosine and 2'-F-ANA-guanosine*

#### **Table S2** – Thermodynamic Parameters of 2'-F- and 2'-F-ANA-modified G-quadruplex

- Fig S9** – <sup>1</sup>H NMR imino proton spectra of <sup>F</sup>G modified (3+1) G-quadruplex-forming sequences
- Fig S10** – <sup>1</sup>H NMR imino proton spectra of <sup>FANA</sup>G modified (3+1) G-quadruplex-forming sequences
- Fig S11** – <sup>1</sup>H NMR imino proton spectra of <sup>F</sup>G modified (4+0) G-quadruplex-forming sequences
- Fig S12** – <sup>1</sup>H NMR imino proton spectra of <sup>FANA</sup>G modified (4+0) G-quadruplex-forming sequences
- Fig S13** – CD spectra of <sup>F</sup>G modified (3+1) G-quadruplex-forming sequences
- Fig S14** – CD spectra of <sup>FANA</sup>G modified (3+1) G-quadruplex-forming sequences
- Fig S15** – CD spectra of <sup>F</sup>G modified (4+0) G-quadruplex-forming sequences
- Fig S16** – CD spectra of <sup>FANA</sup>G modified (4+0) G-quadruplex-forming sequences
- Fig S17** – UV melting of <sup>F</sup>G modified (3+1) G-quadruplex-forming sequences
- Fig S18** – Fraction Folded UV melting of <sup>F</sup>G modified (3+1) G-quadruplex-forming sequences
- Fig S19** – UV melting of <sup>FANA</sup>G modified (3+1) G-quadruplex-forming sequences
- Fig S20** – Fraction Folded UV melting of <sup>FANA</sup>G modified (3+1) G-quadruplex-forming sequences
- Fig S21** – UV melting of <sup>F</sup>G modified (4+0) G-quadruplex-forming sequences
- Fig S22** – Fraction Folded UV melting of <sup>F</sup>G modified (4+0) G-quadruplex-forming sequences
- Fig S23** – UV melting of <sup>FANA</sup>G modified (4+0) G-quadruplex-forming sequences
- Fig S24** – Fraction Folded UV melting of <sup>FANA</sup>G modified (4+0) G-quadruplex-forming sequences

**Table S1.** Thermodynamic Parameters of LNA-modified G-quadruplex

| Name <sup>a</sup>   | Sequence (5'→3') <sup>b</sup>              | T <sub>m</sub> <sup>c</sup><br>(°C) | ΔH <sup>d</sup><br>(kcal•mol <sup>-1</sup> ) | ΔS <sup>d</sup><br>(kcal•mol <sup>-1</sup> K <sup>-1</sup> ) | ΔG <sub>37°C</sub> <sup>d</sup><br>(kcal•mol <sup>-1</sup> ) |
|---------------------|--------------------------------------------|-------------------------------------|----------------------------------------------|--------------------------------------------------------------|--------------------------------------------------------------|
| (4+0) native        | TTGGGTGGGTGGGTGGGT                         | 77.1 ± 0.5                          | 59.6                                         | 0.170                                                        | 6.8 ± 0.0                                                    |
| PS-L3               | TT <b>L</b> GGTGGGTGGGTGGGT                | 82.0 ± 0.4                          | 65.4                                         | 0.184                                                        | 8.3 ± 0.0                                                    |
| PS-L4               | TT <b>L</b> GLTGGGTGGGTGGGT                | 85.3 ± 0.3                          | 67.1                                         | 0.187                                                        | 9.0 ± 0.1                                                    |
| PS-L5               | TT <b>L</b> GG <b>L</b> TGGGTGGGTGGGT      | 36.0 ± 0.4                          | -                                            | -                                                            | -                                                            |
| PS-L7               | TTGGGT <b>L</b> GGTGGGTGGGT                | 84.3 ± 0.0                          | 77.9                                         | 0.218                                                        | 10.3 ± 0.1                                                   |
| PS-L8               | TTGGGT <b>L</b> GLTGGGTGGGT                | 80.2 ± 0.2                          | 69.2                                         | 0.196                                                        | 8.5 ± 0.1                                                    |
| PS-L9               | TTGGGT <b>L</b> G <b>L</b> TGGGTGGGT       | 32.2 ± 0.1                          | -                                            | -                                                            | -                                                            |
| PS-L11              | TTGGGTGGGT <b>L</b> GGTGGGT                | 84.9 ± 0.1                          | 74.1                                         | 0.207                                                        | 9.9 ± 0.2                                                    |
| PS-L12              | TTGGGTGGGT <b>L</b> GLTGGGT                | 79.8 ± 0.1                          | 68.4                                         | 0.194                                                        | 8.3 ± 0.1                                                    |
| PS-L13              | TTGGGTGGGT <b>L</b> G <b>L</b> TGGGT       | 31.7 ± 0.5                          | -                                            | -                                                            | -                                                            |
| PS-L15              | TTGGGTGGGTGGGT <b>L</b> GGT                | 83.2 ± 0.1                          | 74.3                                         | 0.208                                                        | 9.6 ± 0.9                                                    |
| PS-L16              | TTGGGTGGGTGGGT <b>L</b> GLT                | 81.0 ± 0.1                          | 61.8                                         | 0.174                                                        | 7.7 ± 0.2                                                    |
| PS-L17              | TTGGGTGGGTGGGT <b>L</b> G <b>L</b> T       | 80.4 ± 0.1                          | 80.5                                         | 0.228                                                        | 9.9 ± 0.8                                                    |
| (3+1) native        | TTGGGTTAGGGTTAGGGTTAGGGA                   | 57.4 ± 0.2                          | 61.8                                         | 0.187                                                        | 3.7 ± 0.2                                                    |
| HT-L3               | TT <b>L</b> GGTTAGGGTTAGGGTTAGGGA          | 55.4 ± 0.3                          | 60.1                                         | 0.183                                                        | 3.4 ± 0.1                                                    |
| HT-L4               | TT <b>L</b> GLTTAGGGTTAGGGTTAGGGA          | 61.6 ± 0.0                          | 63.7                                         | 0.190                                                        | 4.7 ± 0.0                                                    |
| HT-L5               | TT <b>L</b> GGTTAGGGTTAGGGTTAGGGA          | 56.8 ± 0.4                          | 55.1                                         | 0.167                                                        | 3.3 ± 0.1                                                    |
| HT-L9               | TTGGGTTA <b>L</b> GGTTAGGGTTAGGGA          | -                                   | -                                            | -                                                            | -                                                            |
| HT-L10              | TTGGGTTA <b>L</b> GLTTAGGGTTAGGGA          | 59.3 ± 0.5                          | 62.9                                         | 0.189                                                        | 4.2 ± 0.1                                                    |
| HT-L11              | TTGGGTTA <b>L</b> G <b>L</b> TTAGGGTTAGGGA | 58.3 ± 0.3                          | 62.6                                         | 0.189                                                        | 4.0 ± 0.1                                                    |
| HT-L15              | TTGGGTTAGGGTTA <b>L</b> GGTTAGGGA          | -                                   | -                                            | -                                                            | -                                                            |
| HT-L16              | TTGGGTTAGGGTTA <b>L</b> GLTTAGGGA          | -                                   | -                                            | -                                                            | -                                                            |
| HT-L17              | TTGGGTTAGGGTTA <b>L</b> G <b>L</b> TTAGGGA | 55.1 ± 0.4                          | 47.5                                         | 0.145                                                        | 2.6 ± 0.1                                                    |
| HT-L21              | TTGGGTTAGGGTTAGGGTTA <b>L</b> GGA          | -                                   | -                                            | -                                                            | -                                                            |
| HT-L22              | TTGGGTTAGGGTTAGGGTTA <b>L</b> G <b>A</b>   | -                                   | -                                            | -                                                            | -                                                            |
| HT-L23 <sup>e</sup> | TTGGGTTAGGGTTAGGGTTA <b>L</b> G <b>L</b> A | 60.5 ± 0.1                          | 52.8                                         | 0.158                                                        | 3.7 ± 0.0                                                    |

[a] The “HT-series” denotes sequences modified from the (3+1) G-quadruplex forming sequence, while the “PS-series” denotes sequences modified from a (4+0) G-quadruplex forming sequence.

[b] Residues with LNA-modified guanosine are denoted as (**L**)

[c] Thermal stability data was obtained via UV melting (HT-series) and CD melting (PS-series) experiments. Salt conditions were (20 mM KPi) for the HT-series and (1.1 mM KPi) for the PS-series. Thermal stability data for the HT-series is presented for sequences which demonstrate a single species in NMR spectra. The uncertainties (± values) indicate the hysteresis between heating and cooling curves.

[d] The values of ΔH and ΔS were deduced from a slope analysis of fraction folded curves assuming a G-quadruplex to single strand transition (unfolding event). ΔG<sub>37°C</sub> was calculated from the relation ΔG(T) = ΔH - TΔS where T=310°K. The uncertainties (± values) indicate the difference between ΔG<sub>37°C</sub> calculated from heating and cooling curves.

[e] Sequence contains a small secondary melting transition at the low temperature range.

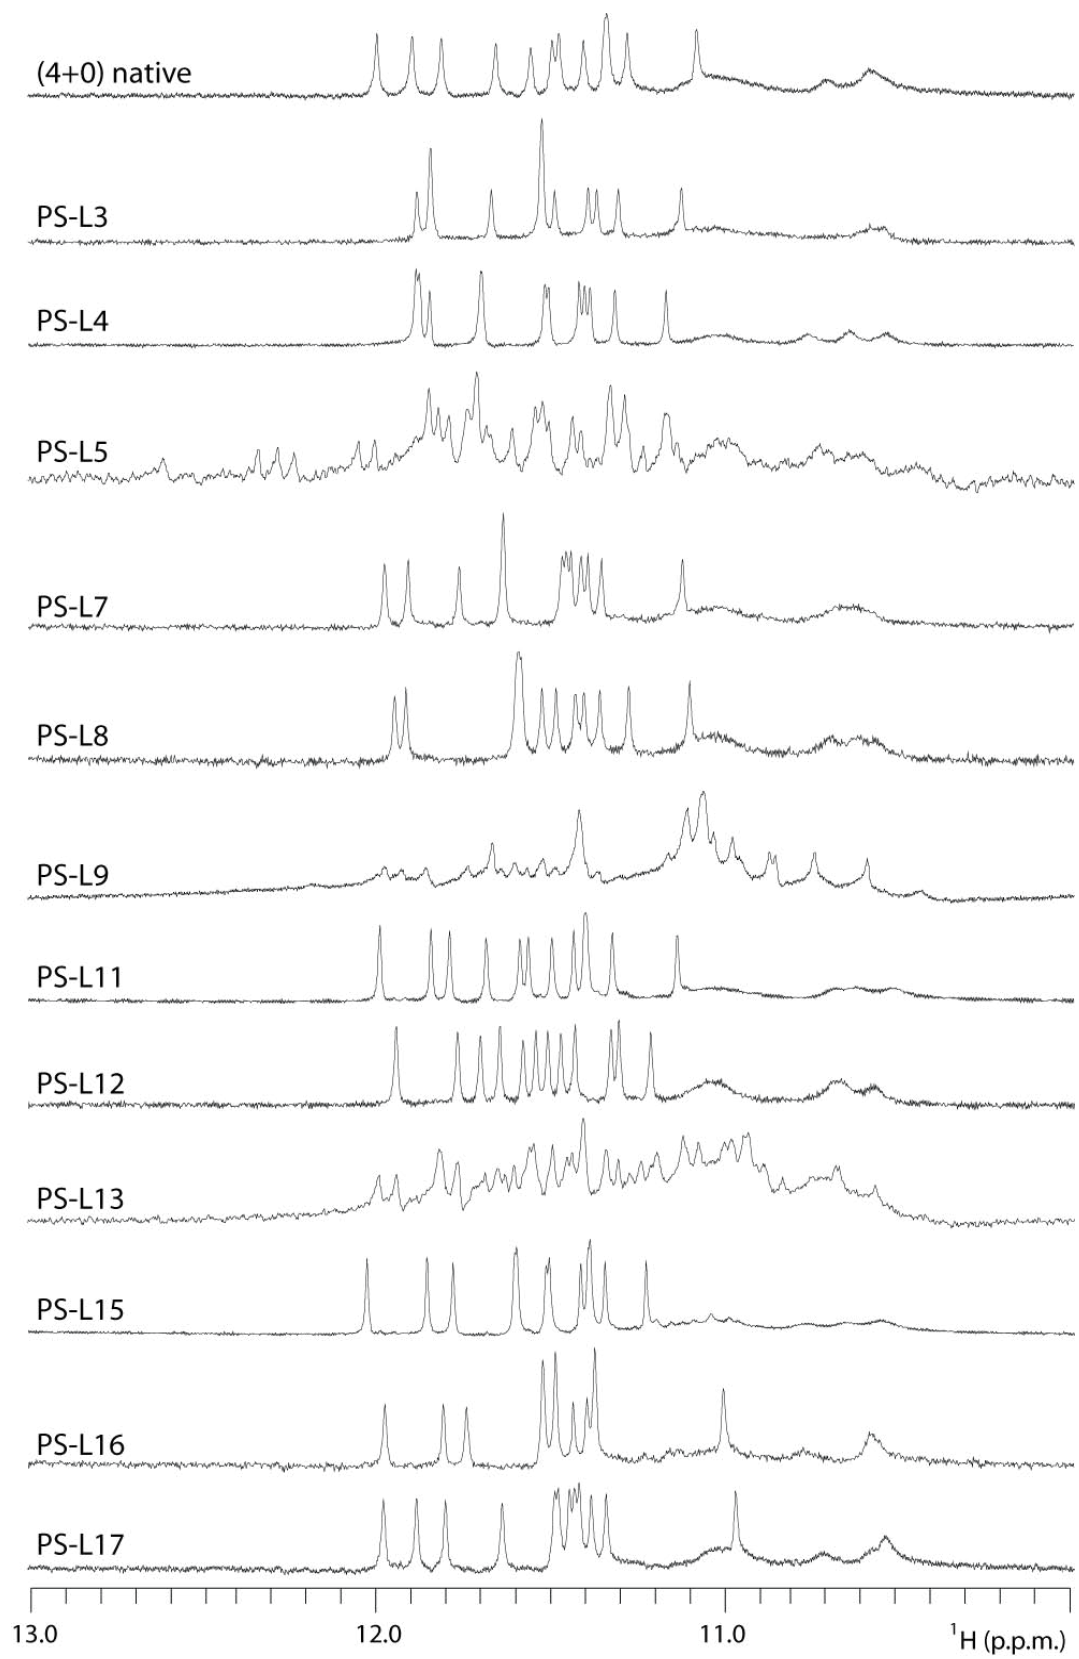

**Figure S1** –  $^1\text{H}$  NMR imino proton spectra of (4+0) G-quadruplex-forming PS-Series sequences.

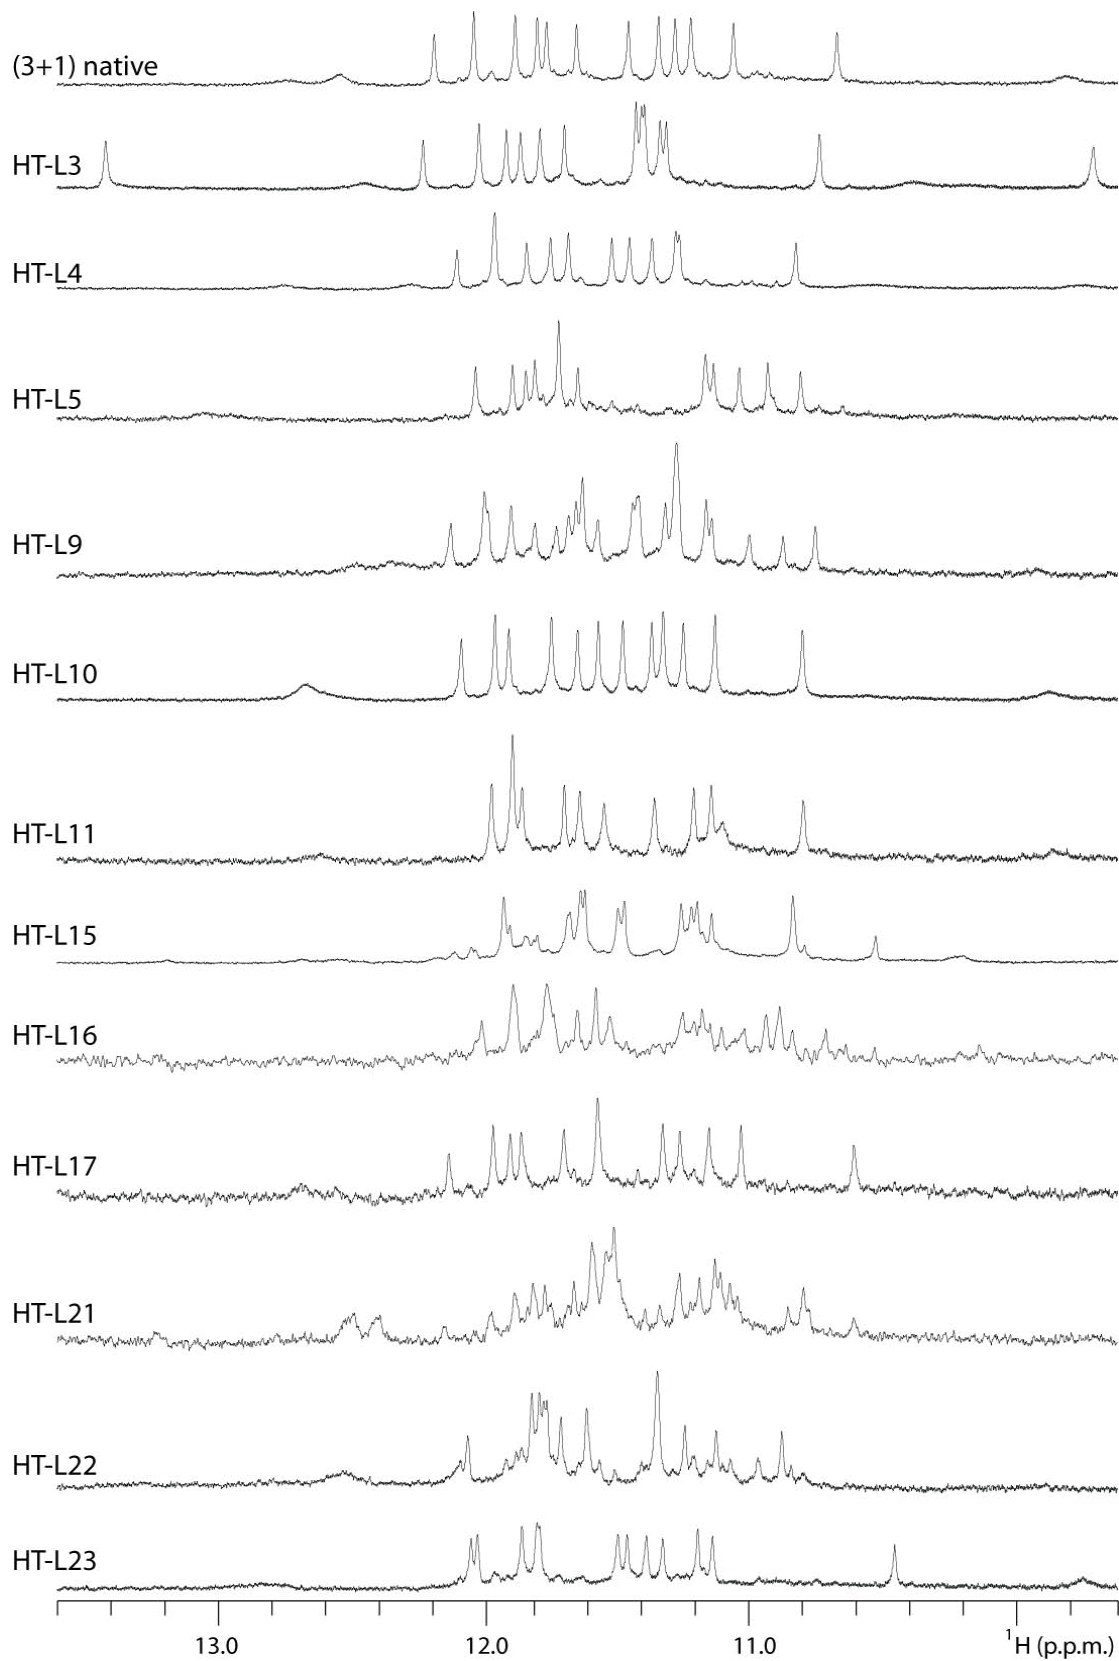

**Figure S2** –  $^1\text{H}$  NMR imino proton spectra of (3+1) G-quadruplex-forming HT-Series sequences.

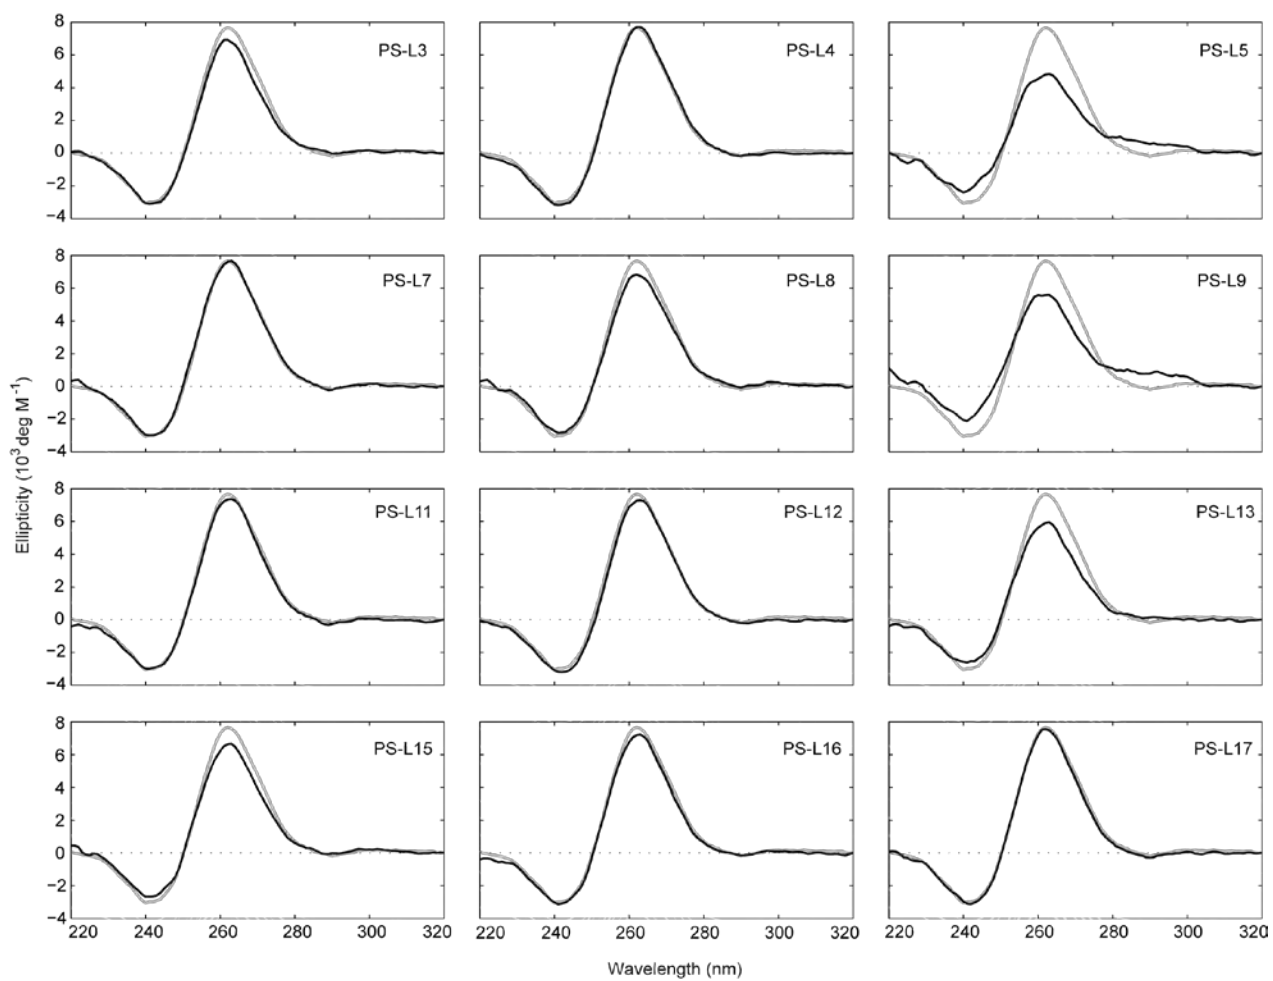

**Fig S3** – CD spectra of the (4+0) G-quadruplex-forming PS-series sequences: CD spectra of modified sequences (black) and the (4+0) G-quadruplex native sequence (grey) are shown.

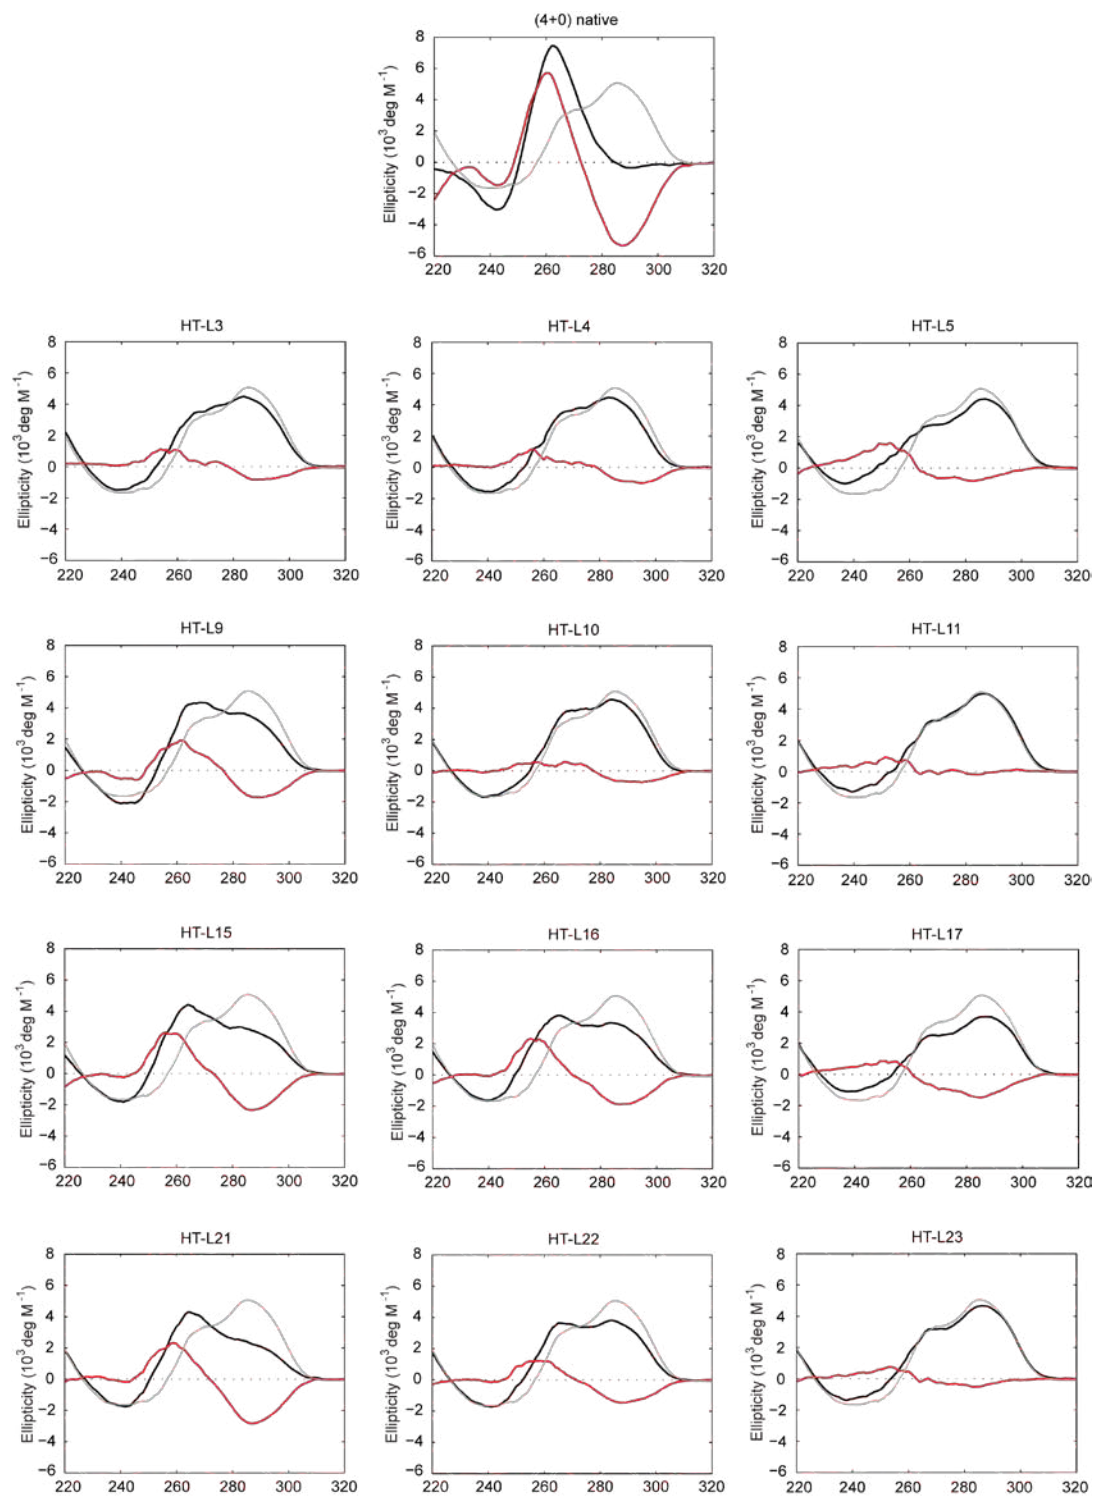

**Figure S4** – CD spectra of the (3+1) G-quadruplex-forming HT-series sequences: CD Spectra of modified sequences (black) and the (3+1) G-quadruplex native sequence (grey) are shown. CD Difference spectra (red) are determined by subtracting the (3+1) G-quadruplex native from the modified spectra. The CD spectrum and CD difference spectrum of the (4+0) G-quadruplex native sequence is shown for reference (top).

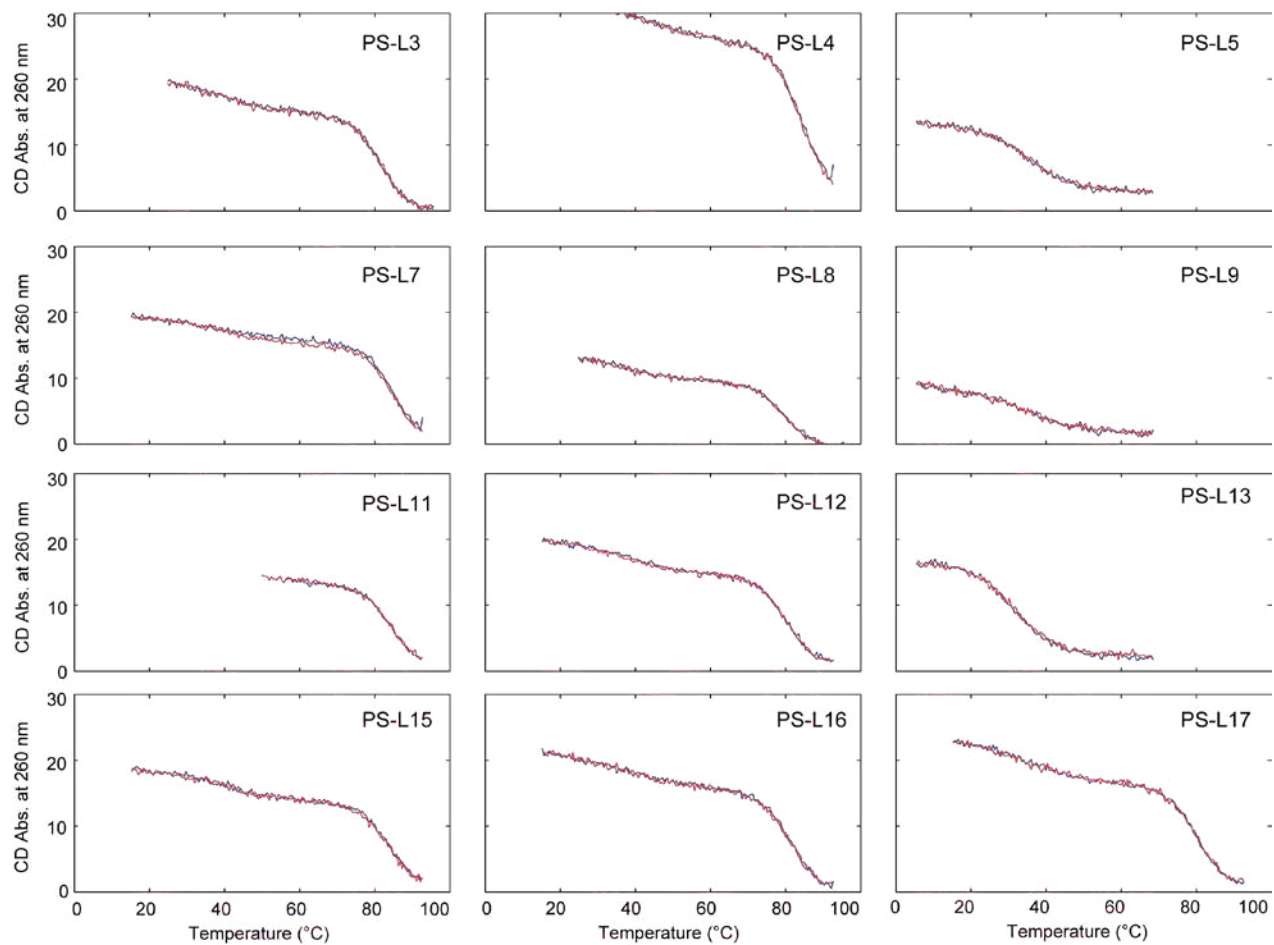

**Fig S5** –CD Melting (4+0) G-quadruplex-forming PS-series sequences. Cooling curve is shown in blue, heating in red.



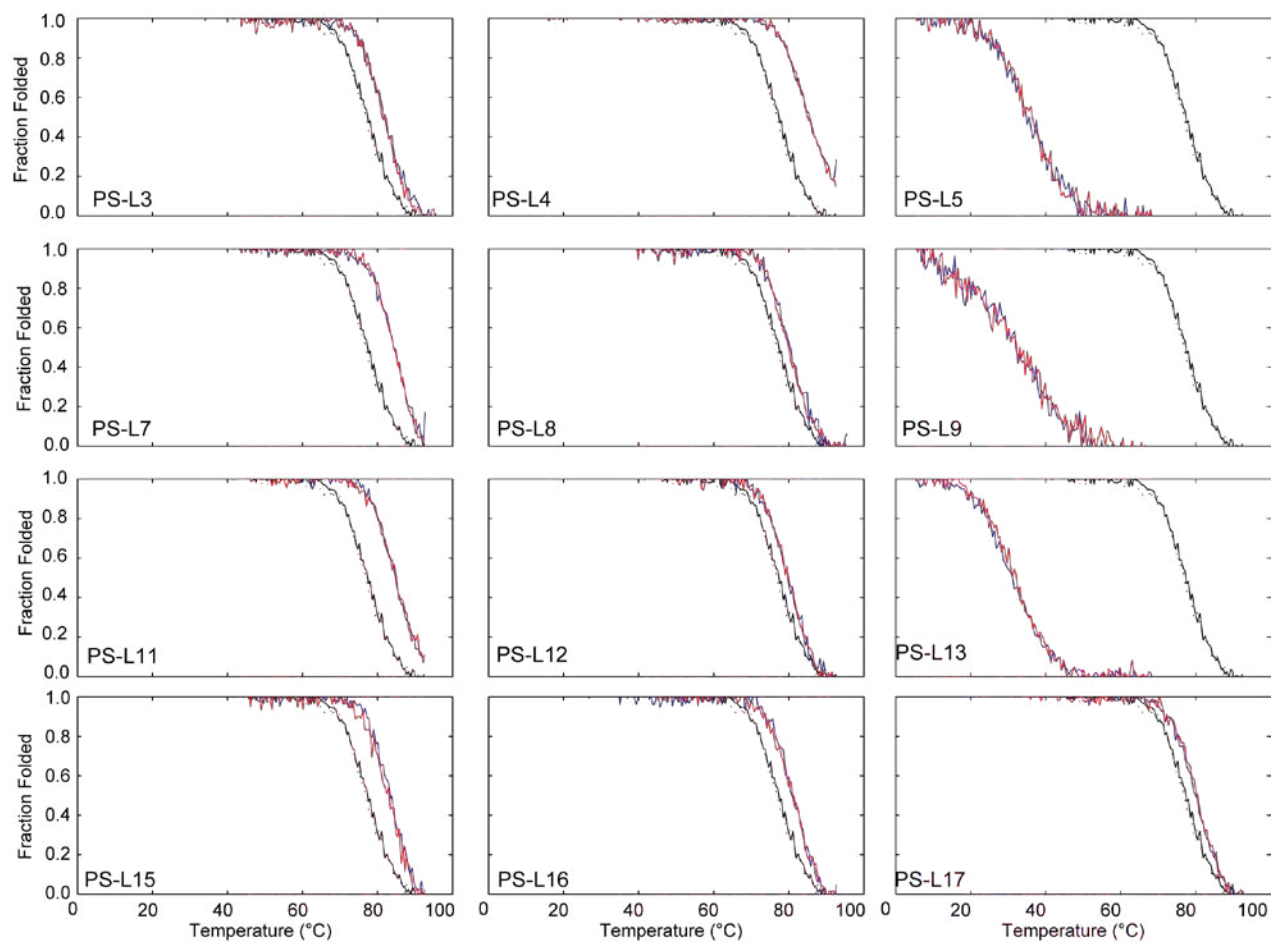

**Fig S6** – Fraction folded CD Melting (4+0) G-quadruplex-forming PS-series sequences. Cooling curve is shown in blue, heating in red. The melting curve of the (4+0) G-quadruplex native sequence is shown in black.

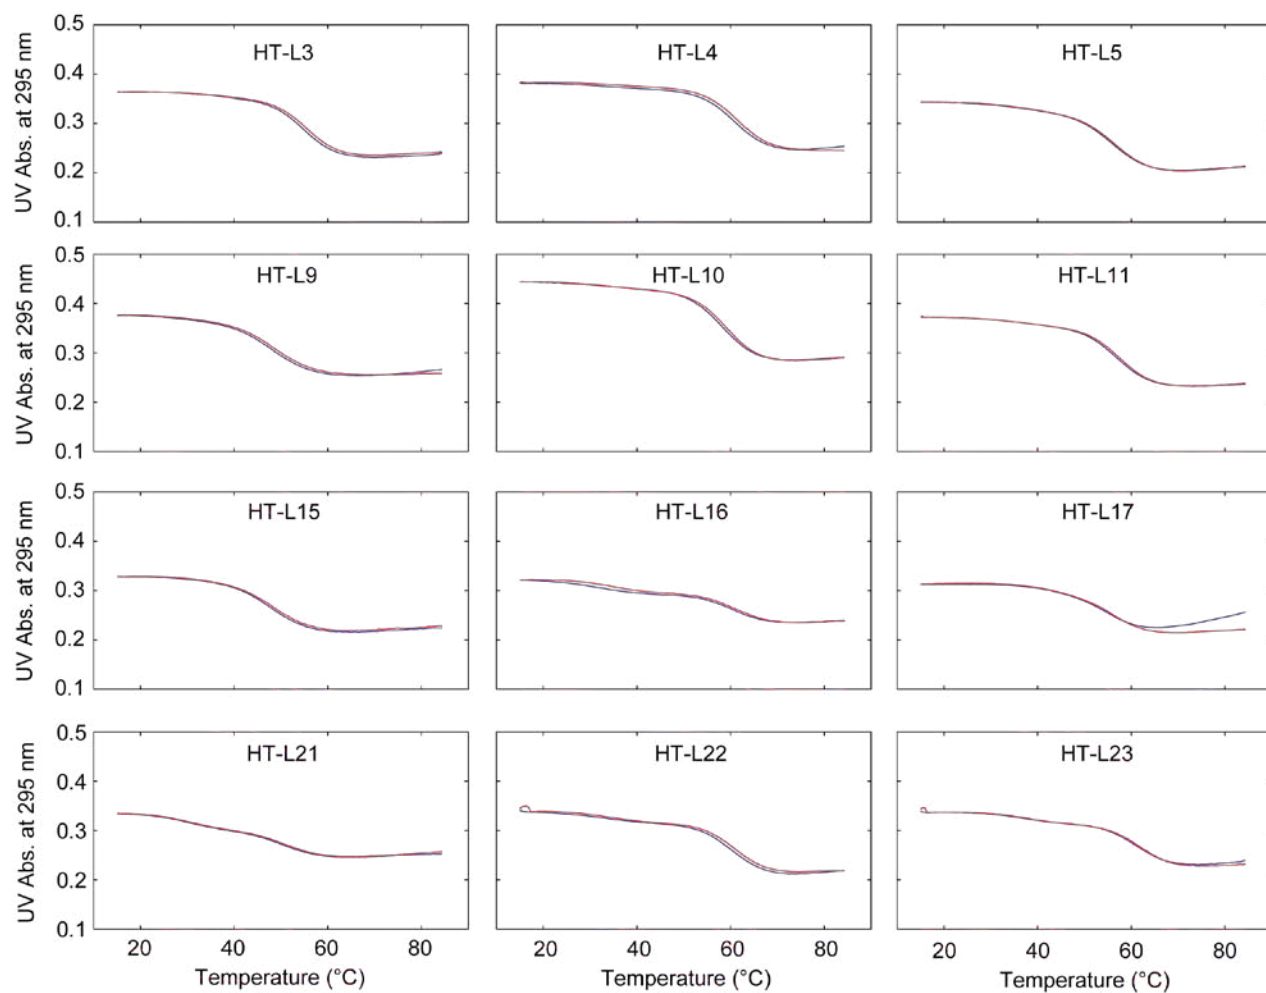

**Fig S7** – UV Melting (3+1) G-quadruplex-forming HT-Series sequences. Cooling curve is shown in blue, heating in red.

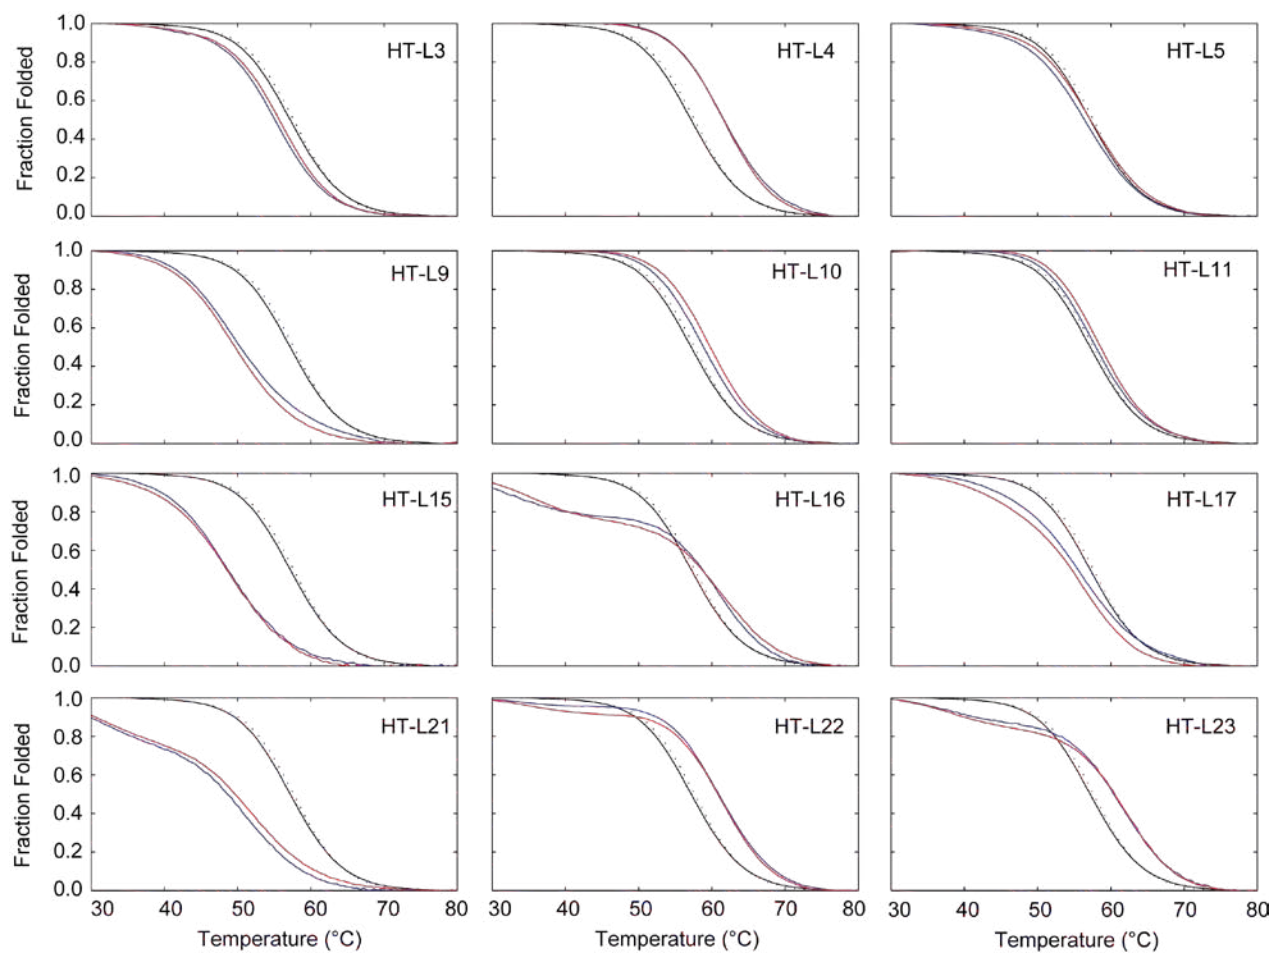

**Fig S8** – Fraction folded CD melting (3+1) G-quadruplex-forming HT-Series sequences. Cooling curve is shown in blue, heating in red. The melting curve of the (3+1) G-quadruplex native sequence is shown in black.

**Table S2.** Thermodynamic Parameters of 2'-F- and 2'-F-ANA-modified G-quadruplex

| Name <sup>a</sup> | Sequence (5'→3') <sup>b</sup>      | T <sub>m</sub> <sup>c</sup><br>(°C) | ΔH <sup>d</sup><br>(kcal•mol <sup>-1</sup> ) | ΔS <sup>d</sup><br>(kcal•mol <sup>-1</sup> K <sup>-1</sup> ) | ΔG <sub>37°C</sub> <sup>d</sup><br>(kcal•mol <sup>-1</sup> ) |
|-------------------|------------------------------------|-------------------------------------|----------------------------------------------|--------------------------------------------------------------|--------------------------------------------------------------|
| (4+0) native      | TTGGGTGGGTGGGTGGGT                 | 76.5 ± 0.4                          | 68.9                                         | 0.197                                                        | 7.8 ± 0.1                                                    |
| PS-F-3            | TT <b>F</b> GGTGGGTGGGTGGGT        | 76.8 ± 0.1                          | 70.6                                         | 0.202                                                        | 8.0 ± 0.3                                                    |
| PS-F-4            | TT <b>GFG</b> TGGGTGGGTGGGT        | 77.0 ± 0.0                          | 69.2                                         | 0.198                                                        | 7.9 ± 0.0                                                    |
| PS-F-5            | TT <b>GGF</b> TGGGTGGGTGGGT        | 75.4 ± 0.1                          | 66.6                                         | 0.191                                                        | 7.3 ± 0.3                                                    |
| PS-F-8            | TTGGGT <b>GFG</b> TGGGTGGGT        | 76.9 ± 0.1                          | 67.5                                         | 0.193                                                        | 7.7 ± 0.1                                                    |
| PS-F-11           | TTGGGTGGGT <b>F</b> GGTGGGT        | 77.2 ± 0.2                          | 74.2                                         | 0.212                                                        | 8.5 ± 0.0                                                    |
| PS-F-12           | TTGGGTGGGT <b>GFG</b> TGGGT        | 75.4 ± 0.1                          | 67.9                                         | 0.195                                                        | 7.5 ± 0.0                                                    |
| PS-F-13           | TTGGGTGGGT <b>GGF</b> TGGGT        | 76.6 ± 0.3                          | 66.1                                         | 0.189                                                        | 7.5 ± 0.2                                                    |
| PS-F-17           | TTGGGTGGGTGGGT <b>GGF</b> T        | 75.2 ± 0.0                          | 72.5                                         | 0.208                                                        | 7.9 ± 0.2                                                    |
| PS-FANA-3         | TT <b>F</b> GGTGGGTGGGTGGGT        | 77.1 ± 0.2                          | 67.5                                         | 0.193                                                        | 7.7 ± 0.2                                                    |
| PS-FANA-4         | TT <b>GFG</b> TGGGTGGGTGGGT        | 79.7 ± 0.0                          | 68.2                                         | 0.193                                                        | 8.3 ± 0.1                                                    |
| PS-FANA-5         | TT <b>GGF</b> TGGGTGGGTGGGT        | 77.2 ± 0.3                          | 68.8                                         | 0.196                                                        | 7.9 ± 0.2                                                    |
| PS-FANA-8         | TTGGGT <b>GFG</b> TGGGTGGGT        | 79.7 ± 0.3                          | 64.5                                         | 0.183                                                        | 7.8 ± 0.2                                                    |
| PS-FANA-11        | TTGGGTGGGT <b>F</b> GGTGGGT        | 77.2 ± 0.2                          | 69.8                                         | 0.199                                                        | 8.0 ± 0.0                                                    |
| PS-FANA-12        | TTGGGTGGGT <b>GFG</b> TGGGT        | 79.3 ± 0.0                          | 72.4                                         | 0.205                                                        | 8.7 ± 0.2                                                    |
| PS-FANA-13        | TTGGGTGGGT <b>GGF</b> TGGGT        | 76.6 ± 0.3                          | 66.9                                         | 0.191                                                        | 7.6 ± 0.3                                                    |
| PS-FANA-17        | TTGGGTGGGTGGGT <b>GGF</b> T        | 76.3 ± 0.2                          | 68.0                                         | 0.195                                                        | 7.6 ± 0.1                                                    |
| (3+1) native      | TTGGGTTAGGGTTAGGGTTAGGGA           | 51.4 ± 0.2                          | 61.7                                         | 0.190                                                        | 2.7 ± 0.1                                                    |
| HT-F-3            | TT <b>F</b> GGTTAGGGTTAGGGTTAGGGA  | -                                   | -                                            | -                                                            | -                                                            |
| HT-F-4            | TT <b>GFG</b> TTAGGGTTAGGGTTAGGGA  | 51.6 ± 0.4                          | 63.1                                         | 0.194                                                        | 2.8 ± 0.1                                                    |
| HT-F-5            | TT <b>GGF</b> TTAGGGTTAGGGTTAGGGA  | 51.2 ± 0.3                          | 62.9                                         | 0.194                                                        | 2.8 ± 0.2                                                    |
| HT-F-9            | TTGGGTTA <b>F</b> GGTTAGGGTTAGGGA  | -                                   | -                                            | -                                                            | -                                                            |
| HT-F-10           | TTGGGTTA <b>GFG</b> TTAGGGTTAGGGA  | 48.9 ± 1.2                          | 60.4                                         | 0.187                                                        | 2.2 ± 0.4                                                    |
| HT-F-11           | TTGGGTTAG <b>GF</b> TTAGGGTTAGGGA  | 49.8 ± 0.8                          | 63.8                                         | 0.197                                                        | 2.5 ± 0.3                                                    |
| HT-F-15           | TTGGGTTAGGGTTA <b>F</b> GGTTAGGGA  | -                                   | -                                            | -                                                            | -                                                            |
| HT-F-16           | TTGGGTTAGGGTTA <b>GFG</b> TTAGGGA  | -                                   | -                                            | -                                                            | -                                                            |
| HT-F-17           | TTGGGTTAGGGTTAG <b>GF</b> TTAGGGA  | 48.7 ± 0.5                          | 59.0                                         | 0.183                                                        | 2.2 ± 0.3                                                    |
| HT-F-21           | TTGGGTTAGGGTTAGGGTTA <b>F</b> GGGA | -                                   | -                                            | -                                                            | -                                                            |
| HT-F-22           | TTGGGTTAGGGTTAGGGTTAG <b>F</b> GGA | 49.8 ± 0.8                          | 66.5                                         | 0.206                                                        | 2.7 ± 0.4                                                    |
| HT-F-23           | TTGGGTTAGGGTTAGGGTTAG <b>GF</b> A  | 49.5 ± 0.1                          | 62.3                                         | 0.193                                                        | 2.4 ± 0.2                                                    |
| HT-FANA-3         | TT <b>F</b> GGTTAGGGTTAGGGTTAGGGA  | -                                   | -                                            | -                                                            | -                                                            |
| HT-FANA-4         | TT <b>GFG</b> TTAGGGTTAGGGTTAGGGA  | 54.5 ± 0.3                          | 66.9                                         | 0.204                                                        | 3.6 ± 0.2                                                    |
| HT-FANA-5         | TT <b>GGF</b> TTAGGGTTAGGGTTAGGGA  | 51.9 ± 0.6                          | 61.3                                         | 0.189                                                        | 2.8 ± 0.3                                                    |
| HT-FANA-9         | TTGGGTTA <b>F</b> GGTTAGGGTTAGGGA  | -                                   | -                                            | -                                                            | -                                                            |
| HT-FANA-10        | TTGGGTTA <b>GFG</b> TTAGGGTTAGGGA  | 54.5 ± 0.7                          | 65.5                                         | 0.200                                                        | 3.5 ± 0.2                                                    |
| HT-FANA-11        | TTGGGTTAG <b>GF</b> TTAGGGTTAGGGA  | 52.9 ± 0.5                          | 62.2                                         | 0.191                                                        | 3.0 ± 0.2                                                    |
| HT-FANA-15        | TTGGGTTAGGGTTA <b>F</b> GGTTAGGGA  | -                                   | -                                            | -                                                            | -                                                            |
| HT-FANA-16        | TTGGGTTAGGGTTA <b>GFG</b> TTAGGGA  | -                                   | -                                            | -                                                            | -                                                            |
| HT-FANA-17        | TTGGGTTAGGGTTAG <b>GF</b> TTAGGGA  | 53.8 ± 0.0                          | 60.6                                         | 0.185                                                        | 3.1 ± 0.3                                                    |
| HT-FANA-21        | TTGGGTTAGGGTTAGGGTTA <b>F</b> GGGA | -                                   | -                                            | -                                                            | -                                                            |
| HT-FANA-22        | TTGGGTTAGGGTTAGGGTTA <b>G</b> FGA  | 53.5 ± 0.7                          | 61.8                                         | 0.189                                                        | 3.1 ± 0.1                                                    |
| HT-FANA-23        | TTGGGTTAGGGTTAGGGTTAG <b>GF</b> A  | 51.9 ± 0.5                          | 66.3                                         | 0.204                                                        | 3.1 ± 0.2                                                    |

[a] The “HT-series” denotes sequences modified from the (3+1) G-quadruplex forming sequence, while the “PS-series” denotes sequences modified from a (4+0) G-quadruplex forming sequence.

[b] Residues with modified nucleotides are denoted as such: 2'-F-guanosine (**F**) and 2'-F-ANA-guanosine (**F**).

[c] Thermal stability data was obtained via UV melting experiments. Salt conditions were (5 mM KCl and 5 mM KPi) for the HT-series and (1 mM KPi) for the PS-series. Data for the HT-series is presented for sequences which demonstrate a single species in NMR spectra. The uncertainties (± values) indicate the hysteresis between heating and cooling curves.

[d] The values of ΔH and ΔS were deduced from a slope analysis of fraction folded curves assuming a G-quadruplex to single strand transition (unfolding event). ΔG<sub>37°C</sub> was calculated from the relation ΔG(T) = ΔH - TΔS where T = 310°K. The uncertainties (± values) indicate the difference between ΔG<sub>37°C</sub> calculated from heating and cooling curves.

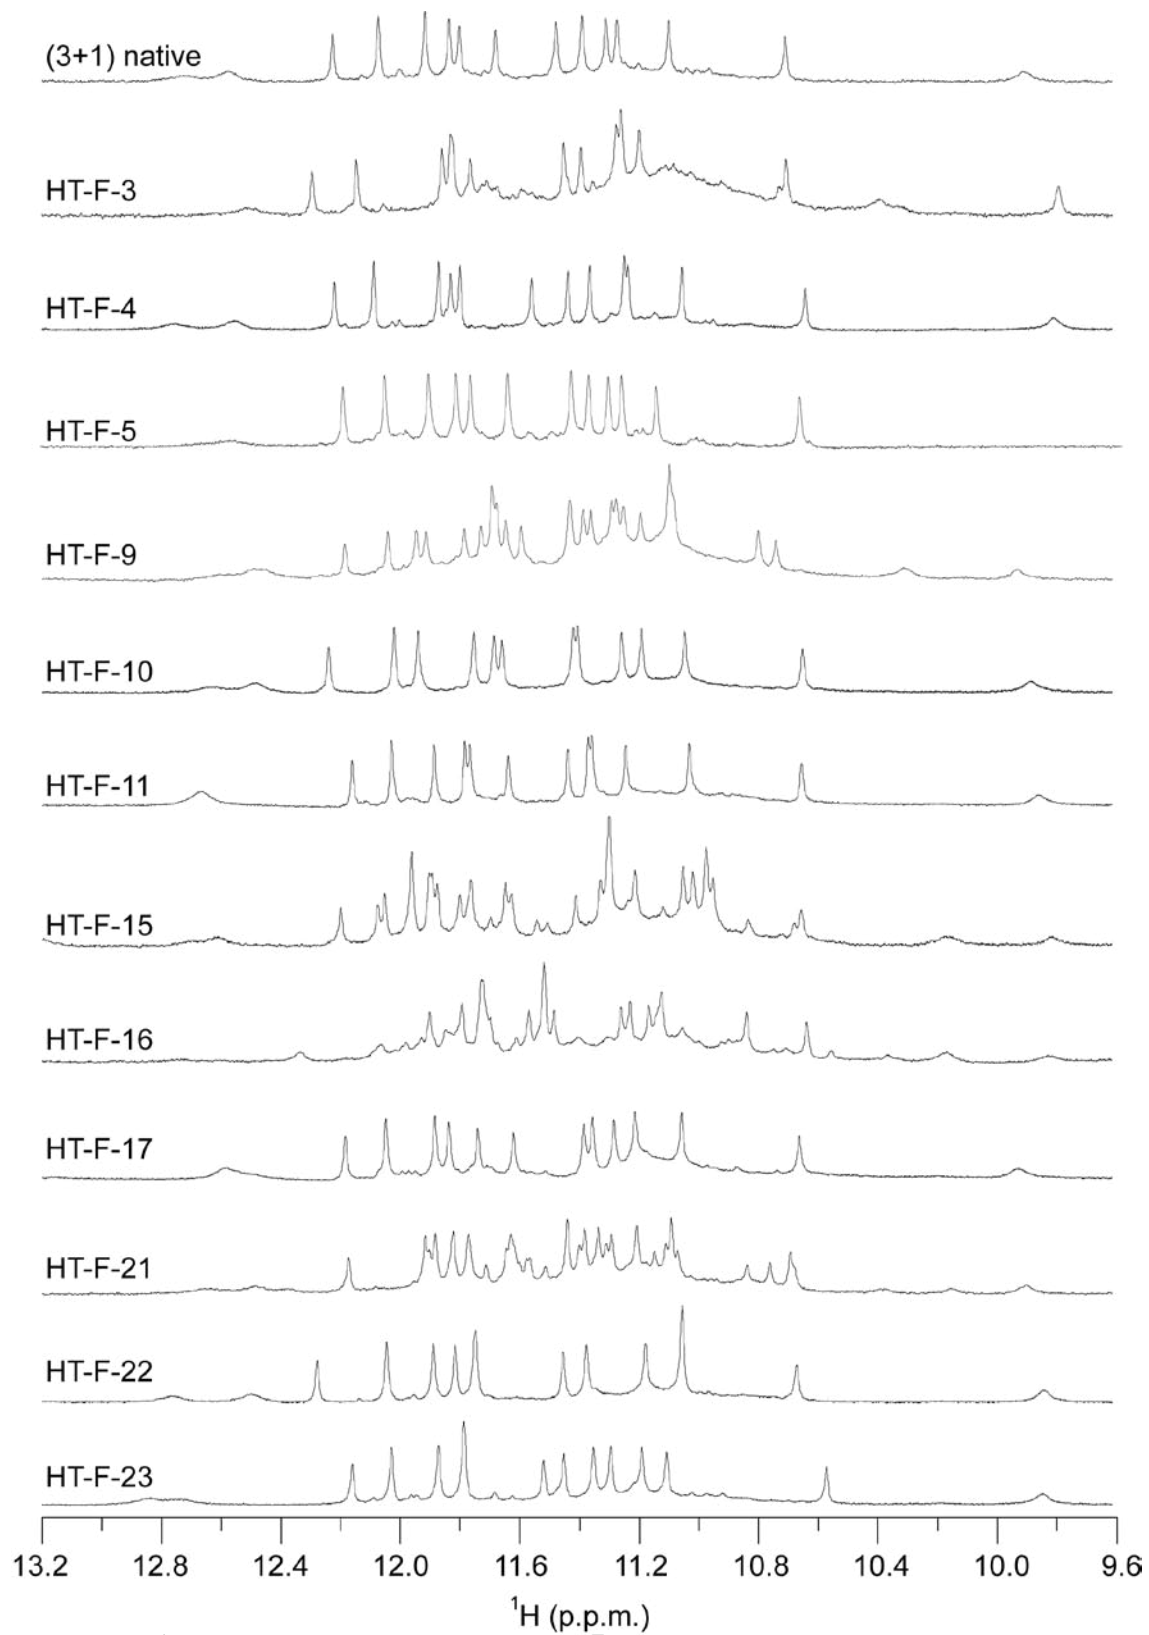

**Figure S9:**  $^1\text{H}$  NMR imino proton spectra of  $^{\text{F}}$ G modified (3+1) G-quadruplex-forming sequences

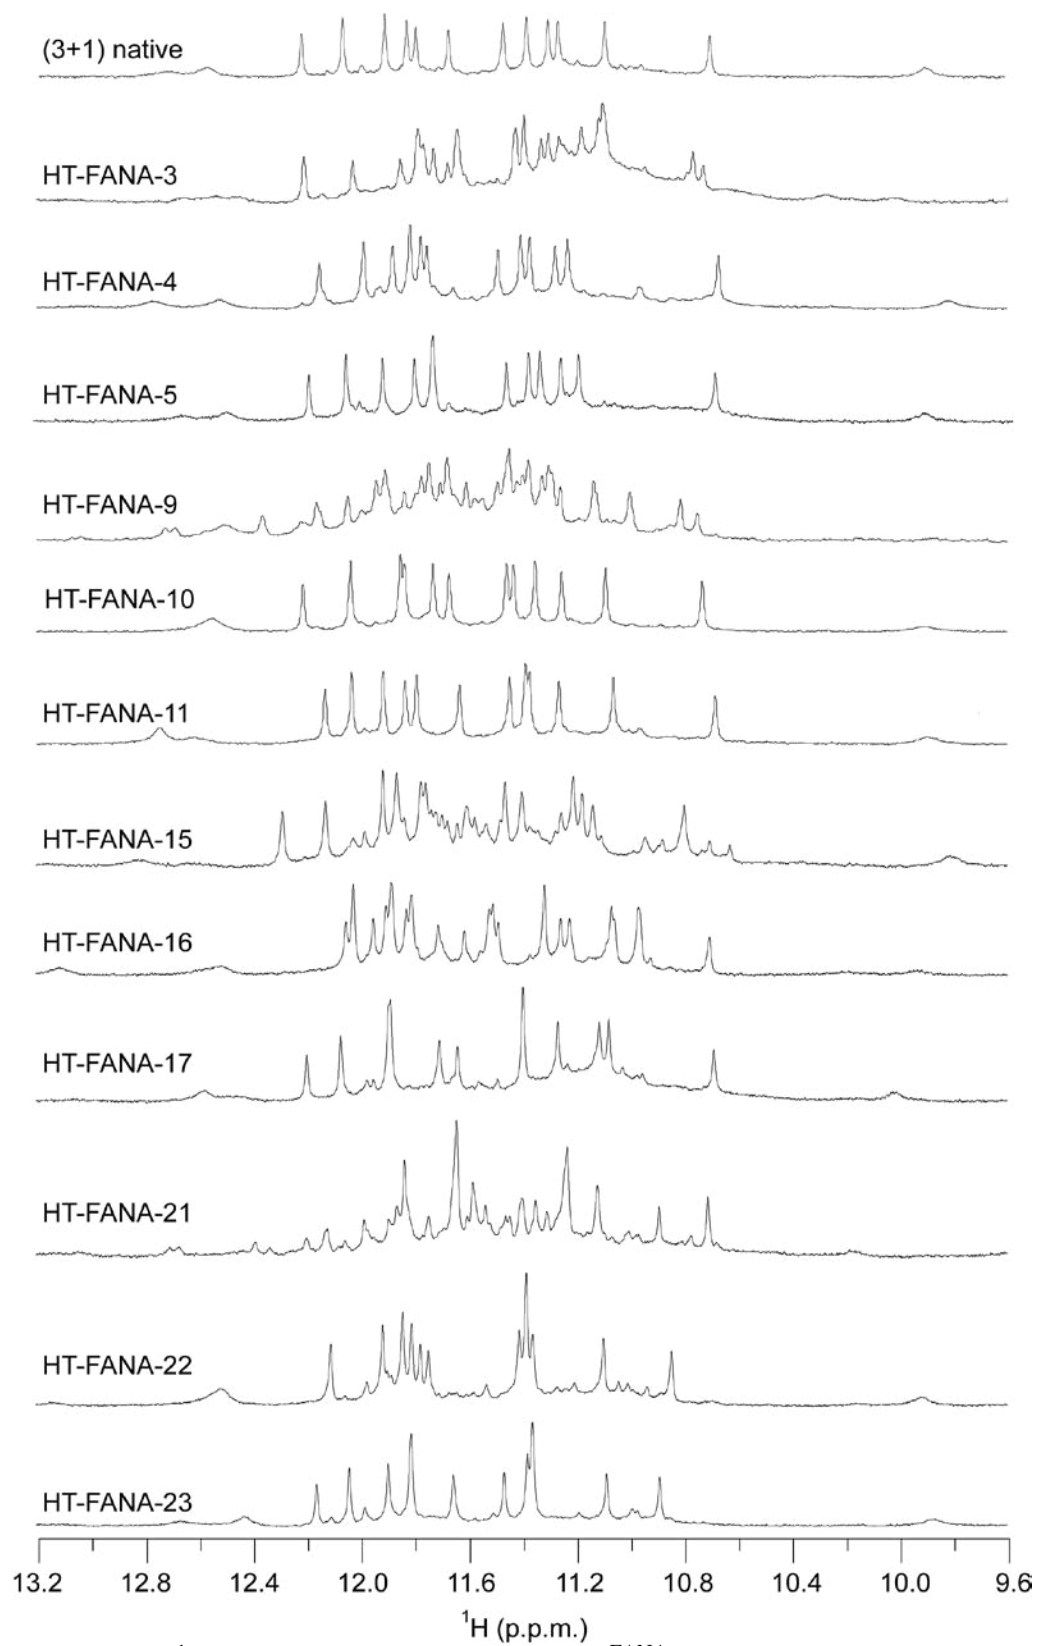

**Figure S10:** <sup>1</sup>H NMR imino proton spectra of <sup>FANA</sup>G modified (3+1) G-quadruplex-forming sequences

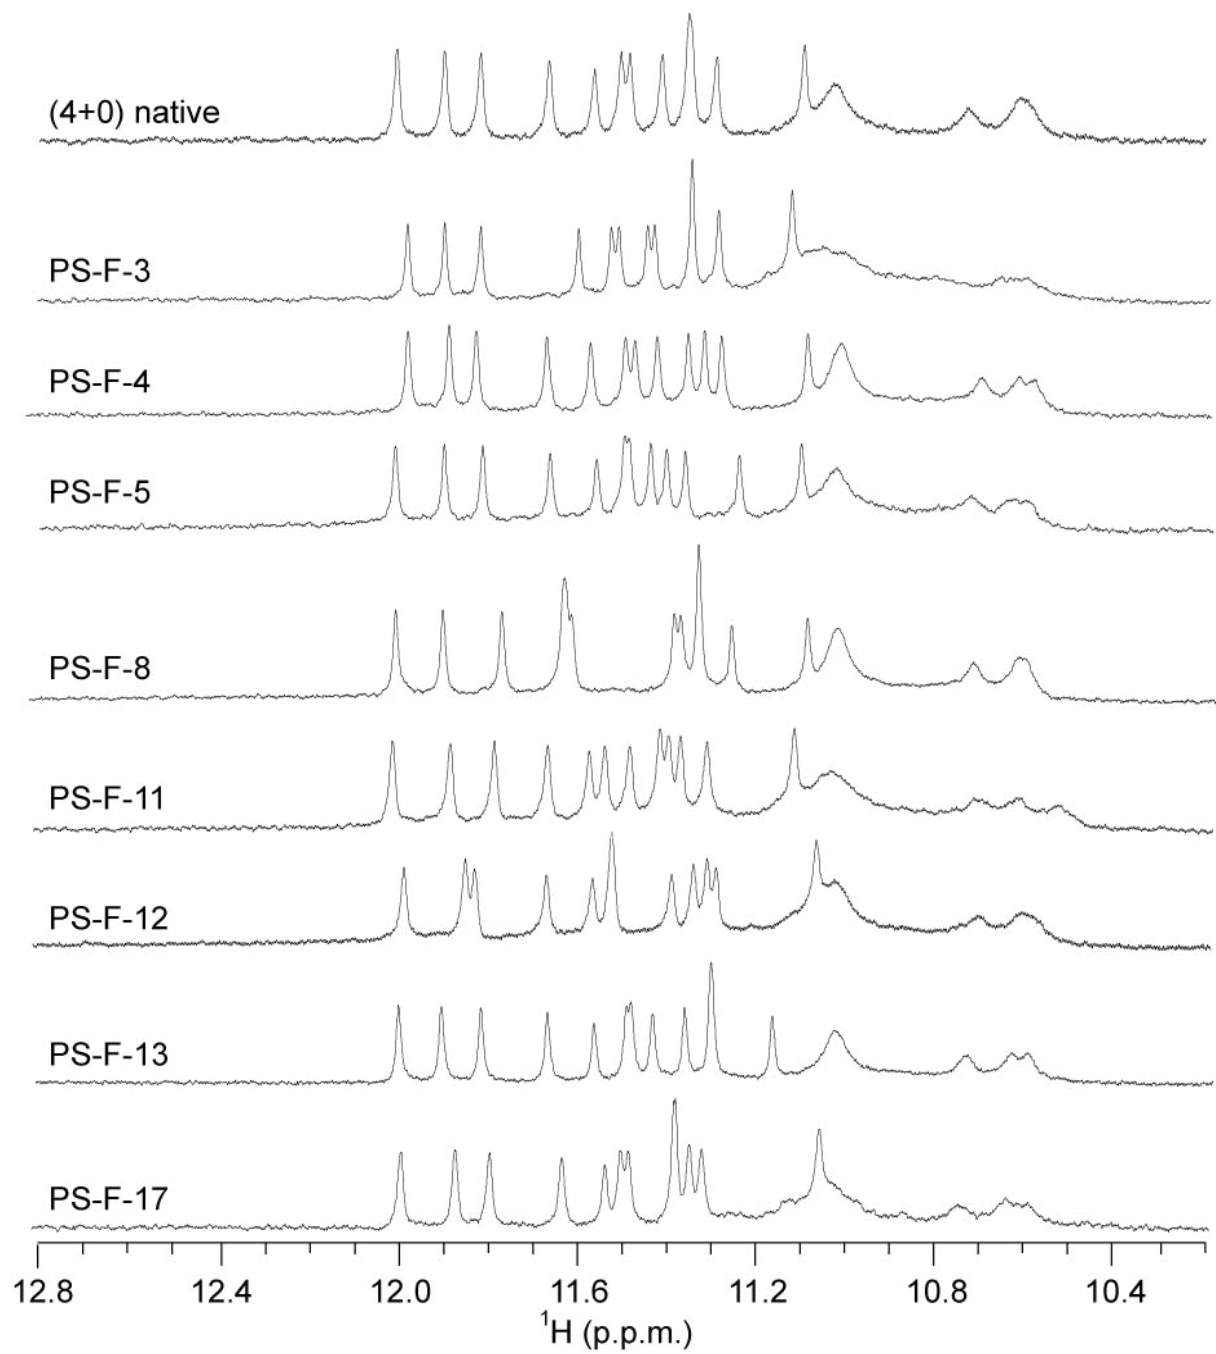

**Figure S11:**  $^1\text{H}$  NMR imino proton spectra of  $^{\text{F}}$ G modified (4+0) G-quadruplex-forming sequences

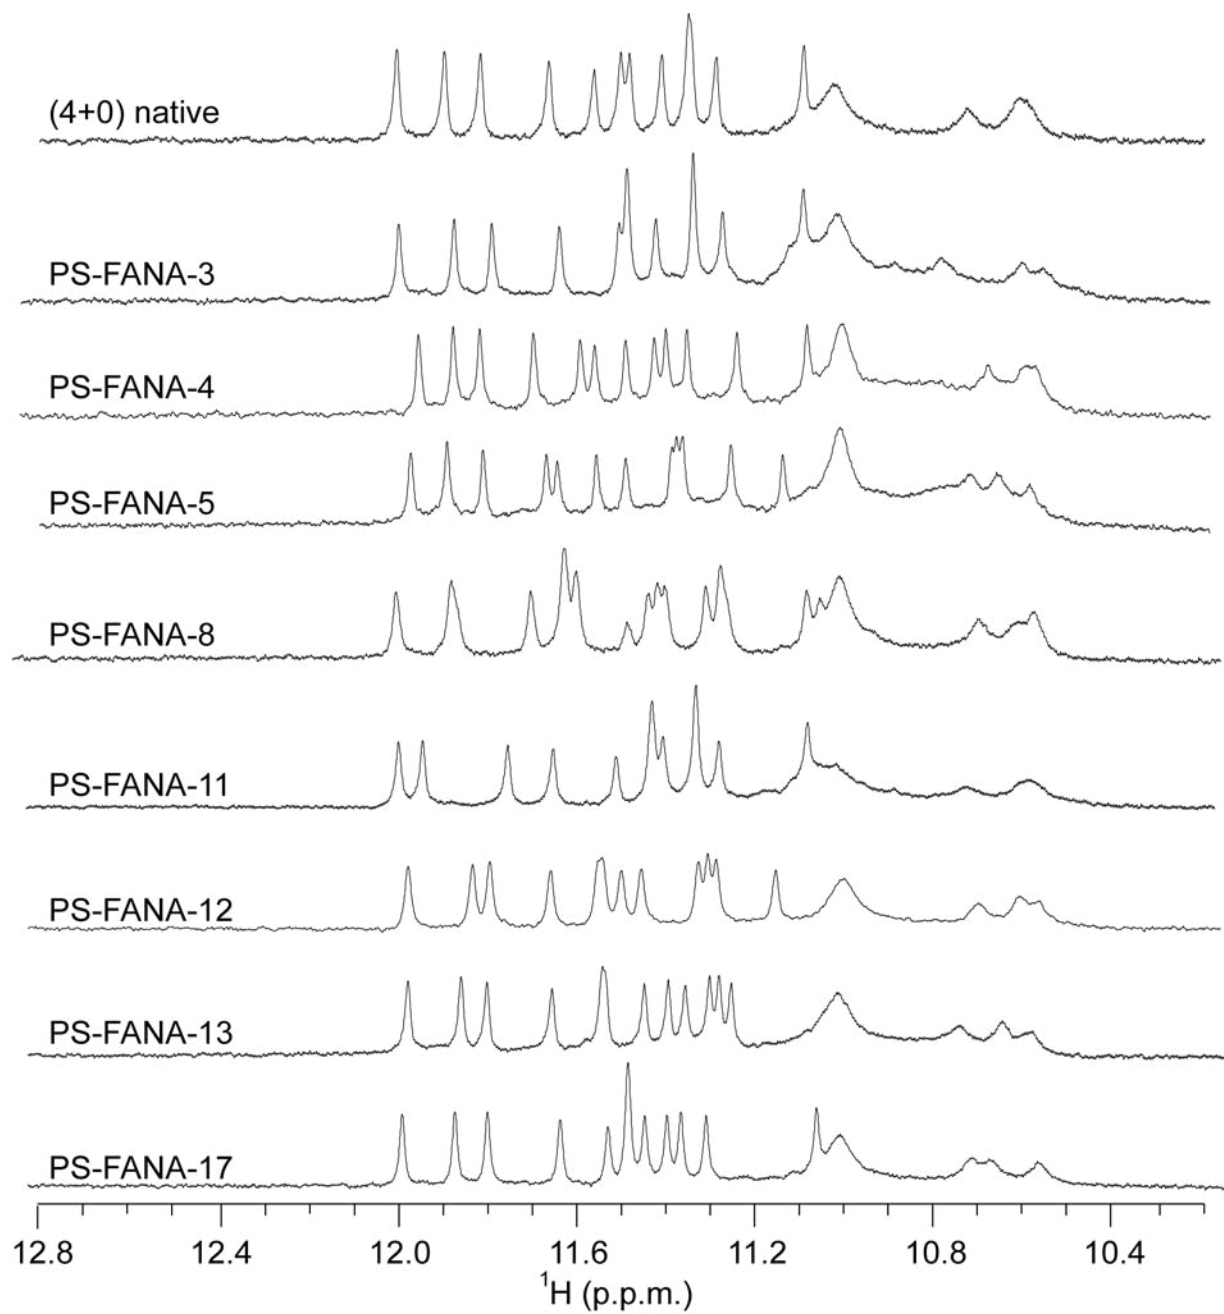

**Figure S12:**  $^1\text{H}$  NMR imino proton spectra of  $^{\text{FANA}}$ G modified (4+0) G-quadruplex-forming sequences



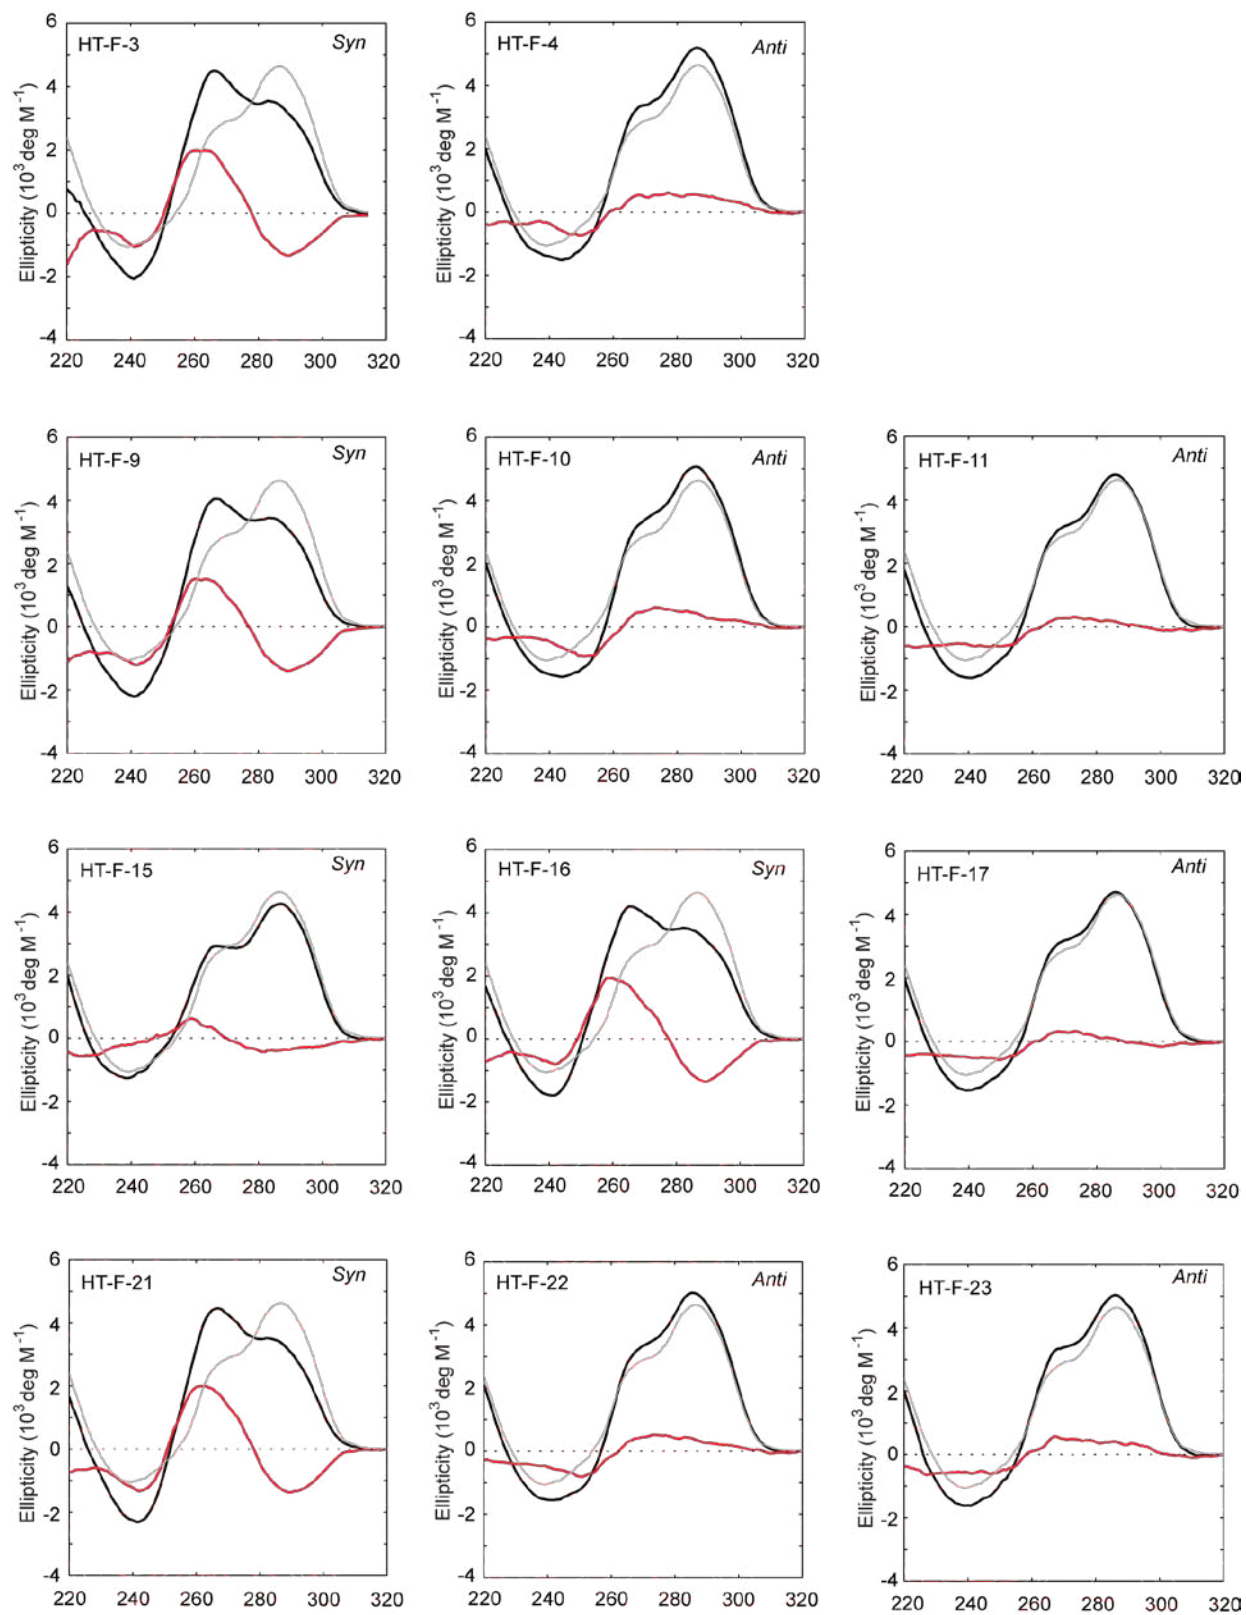

**Figure S13:** CD spectra (black) of <sup>F</sup>G-modified HT-series. Native (3+1) G-quadruplex is shown as a reference (grey). Difference spectra (red) compare the modified sequence to the native one.

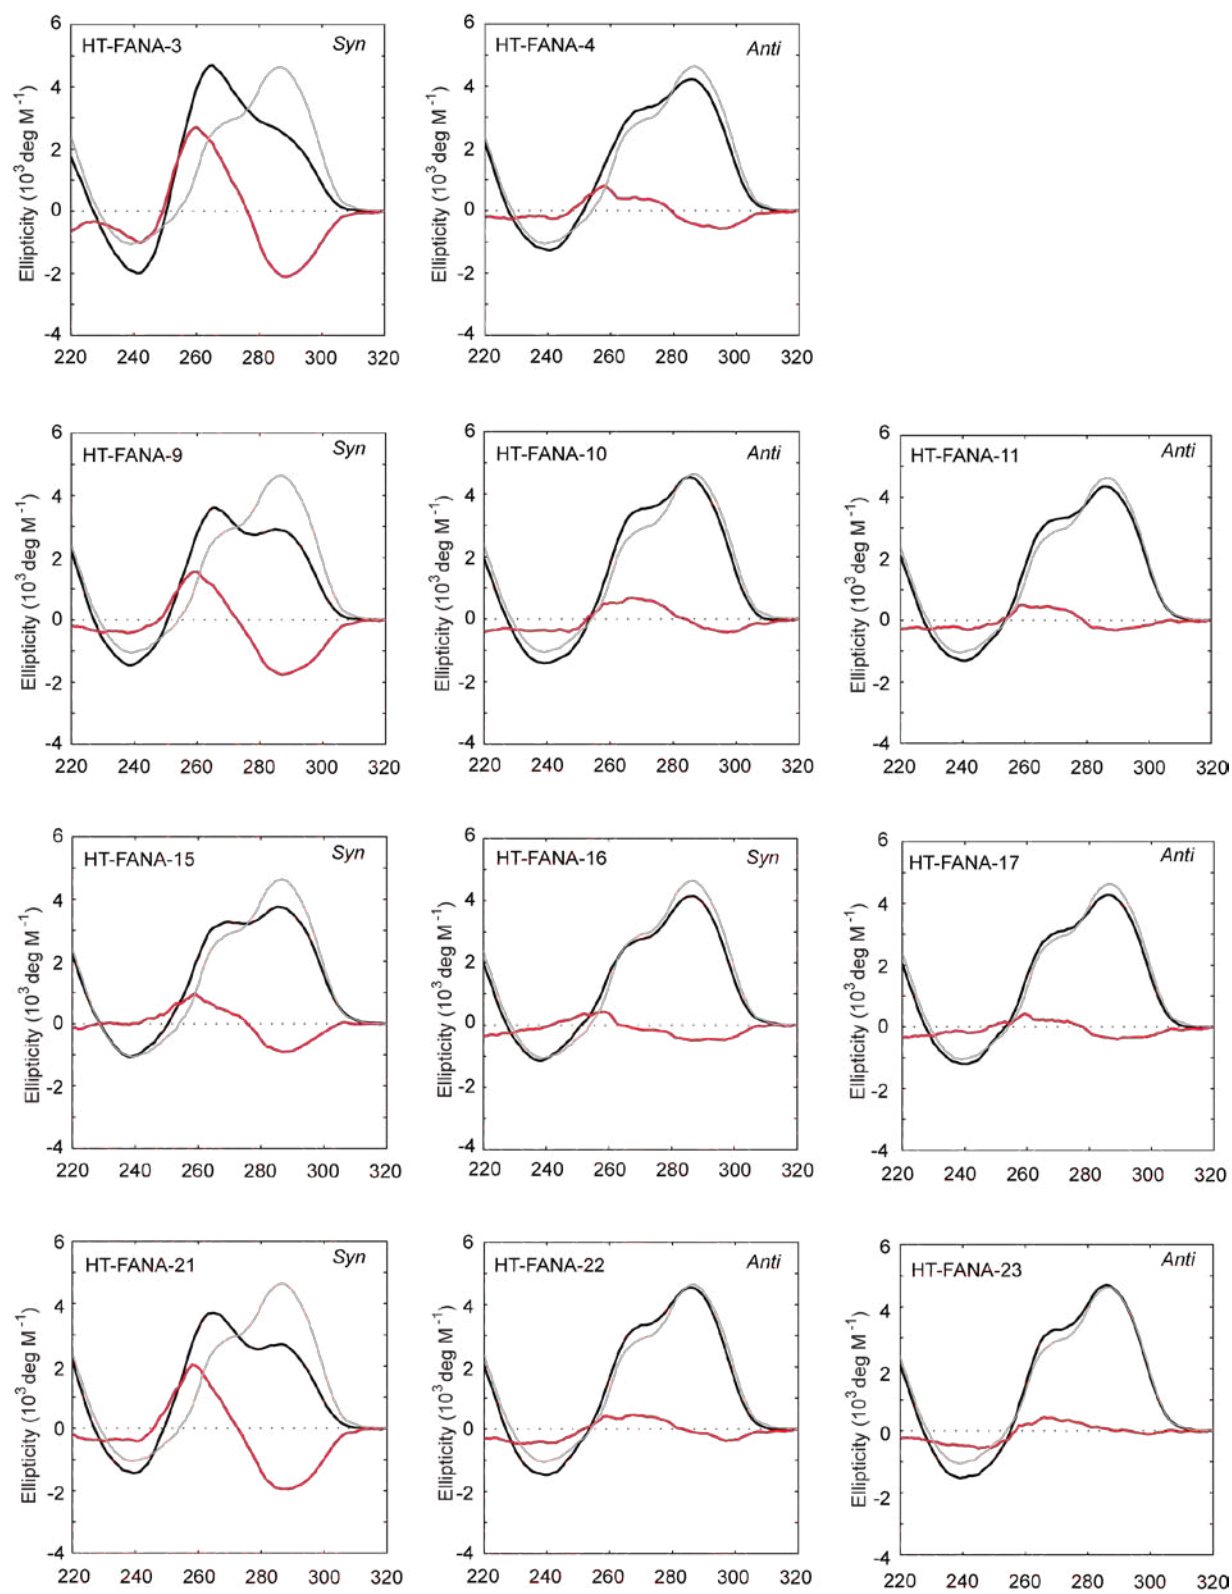

**Figure S14:** CD spectra (black) of <sup>FANA</sup>G-modified HT-series. Native (3+1) G-quadruplex is shown as a reference (grey). Difference spectra (red) compare the modified sequence to the native one.

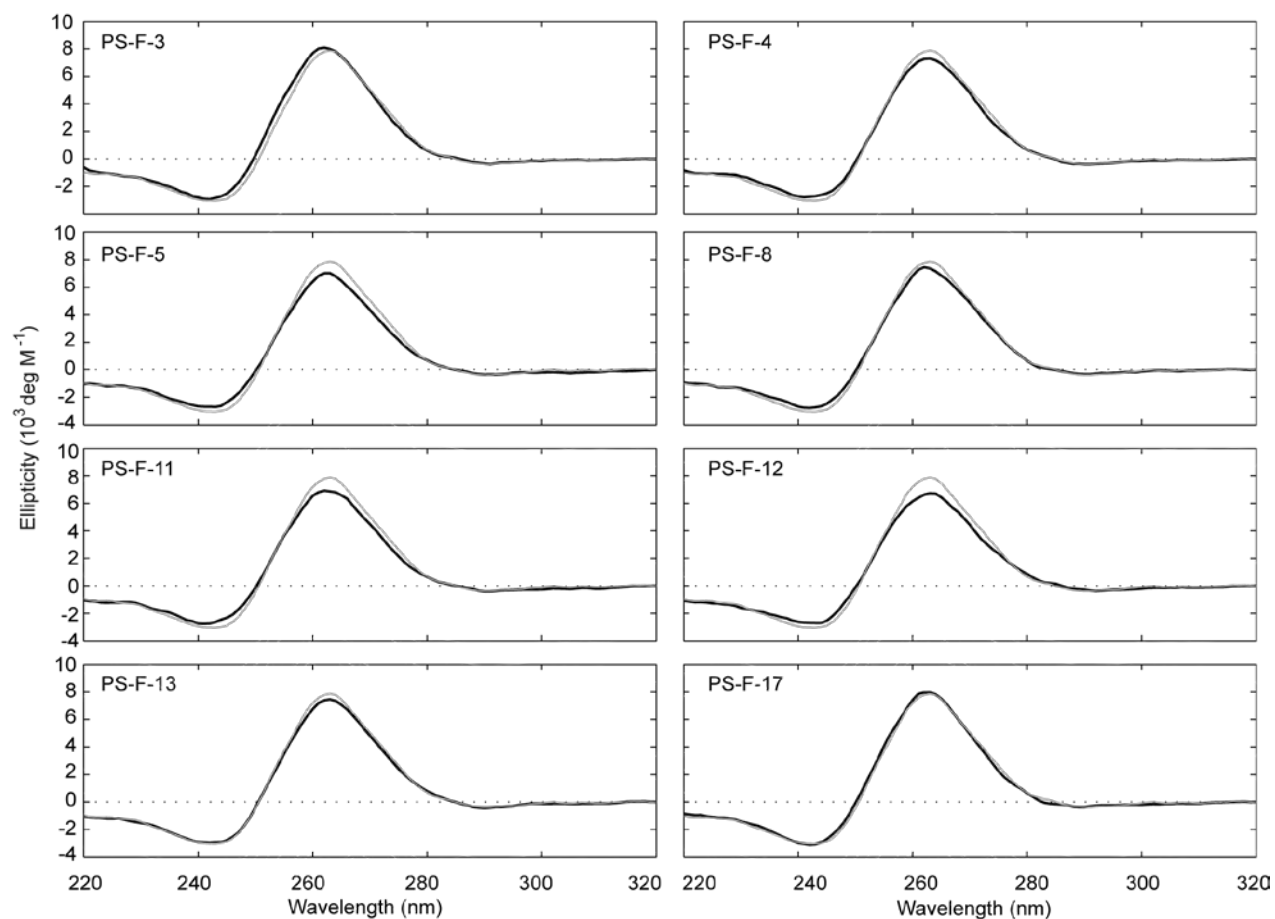

**Figure S15:** CD spectra (black) of <sup>F</sup>G-modified PS-series. Native (4+0) G-quadruplex is shown as a reference (grey).

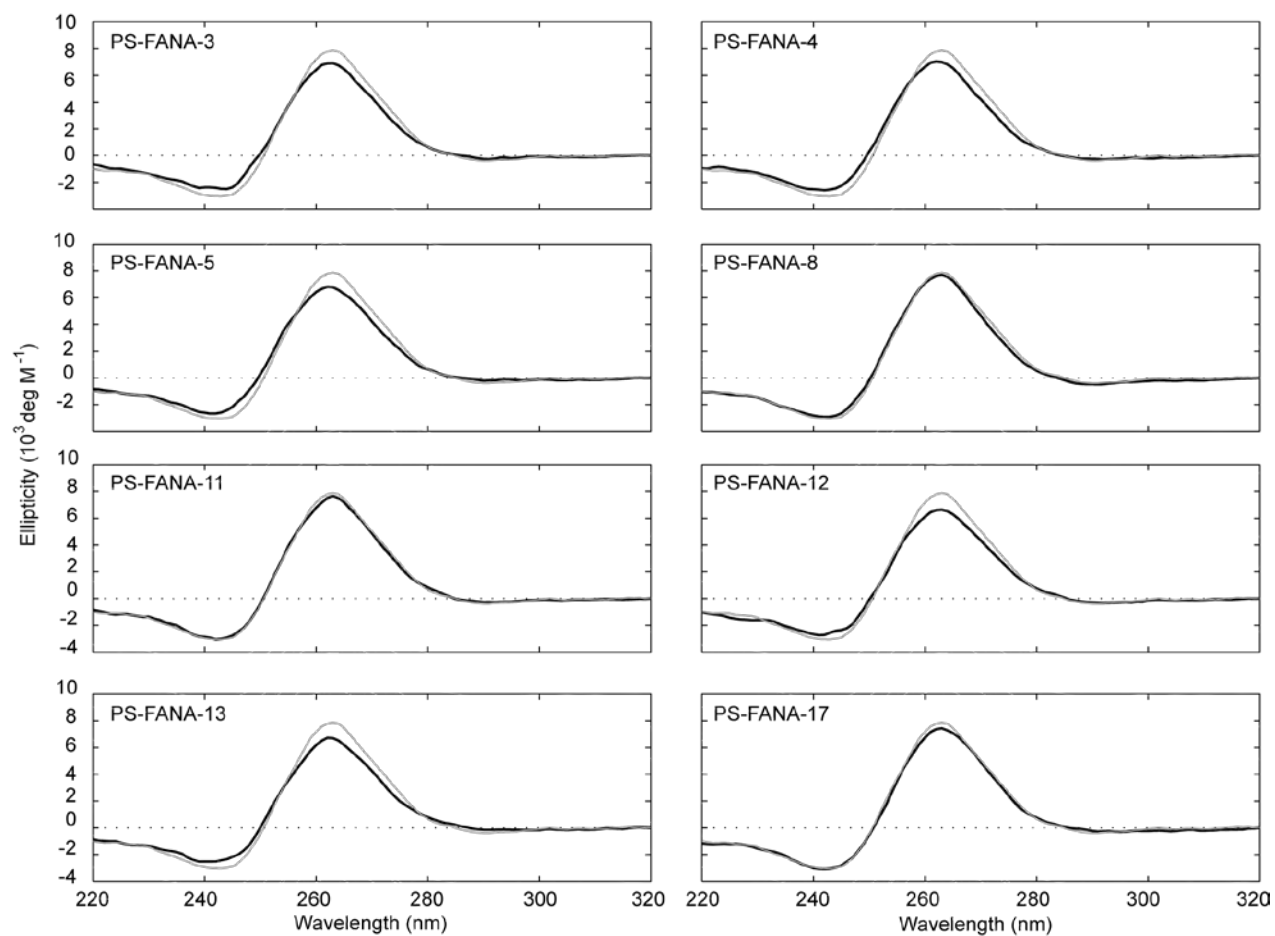

**Figure S16:** CD spectra (black) of <sup>FANA</sup>G-modified PS-series. Native (4+0) G-quadruplex is shown as a reference (grey).

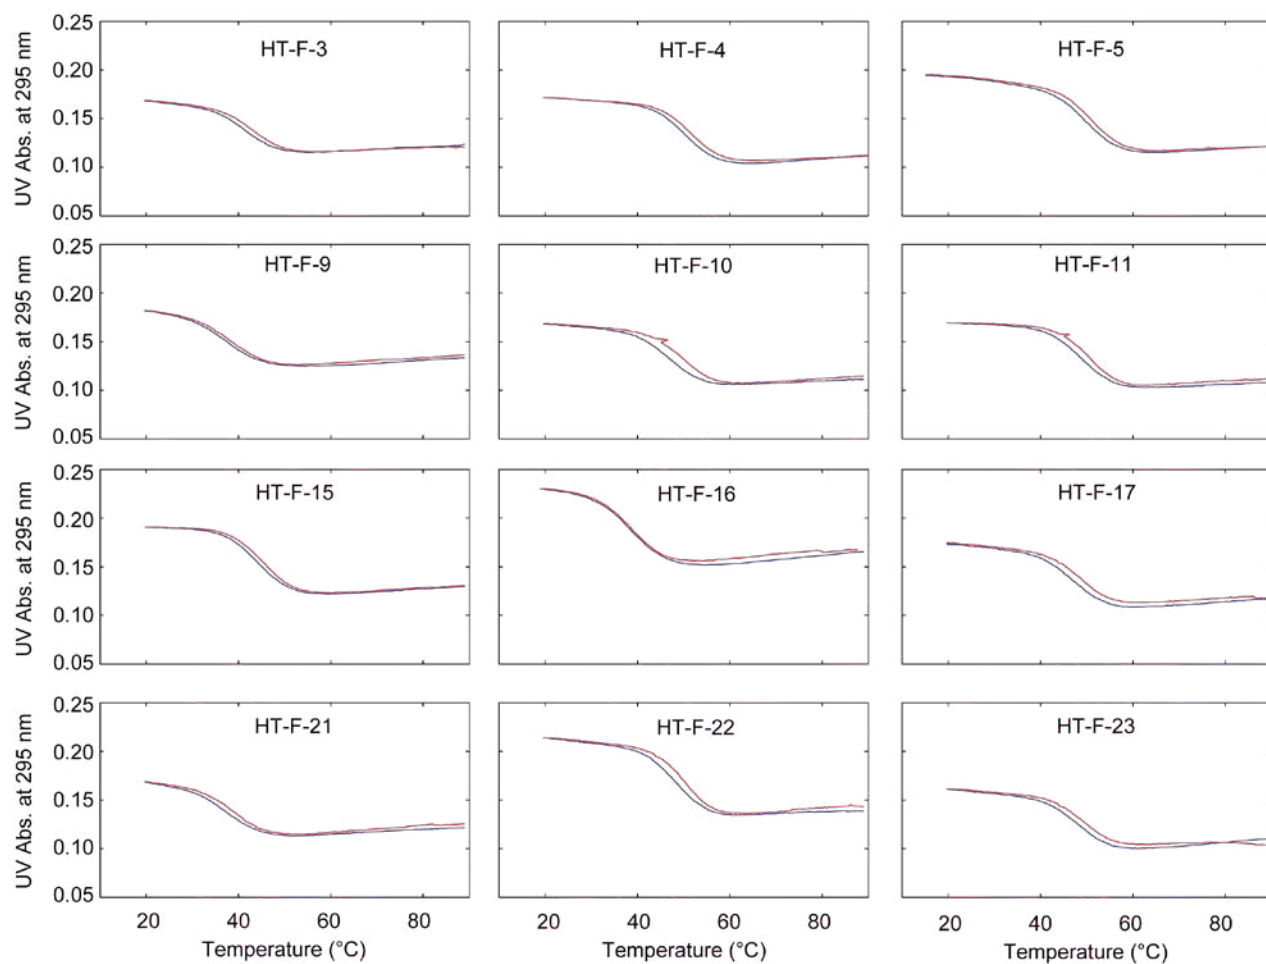

**Figure S17:** UV absorbance spectra at 295 nm of thermal denaturing experiments of <sup>F</sup>G-modified HT-series sequences. Both heating (red) and cooling (blue) curves are shown.

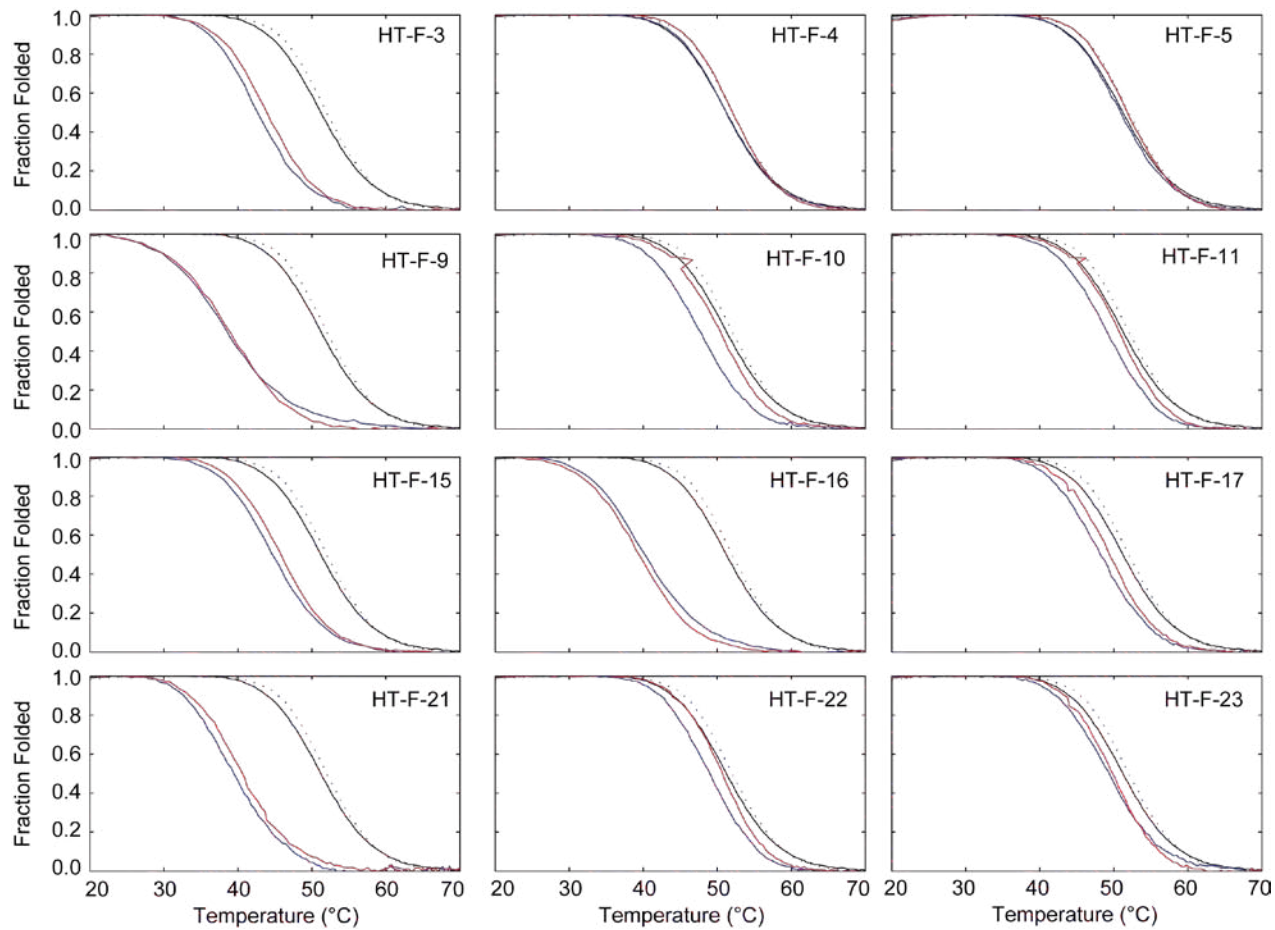

**Figure S18:** Fraction folded UV spectra of thermal denaturing experiments of <sup>F</sup>G-modified HT-series sequences. Heating (red) and cooling (blue) curves are shown. The native sequence (black line) is shown for reference

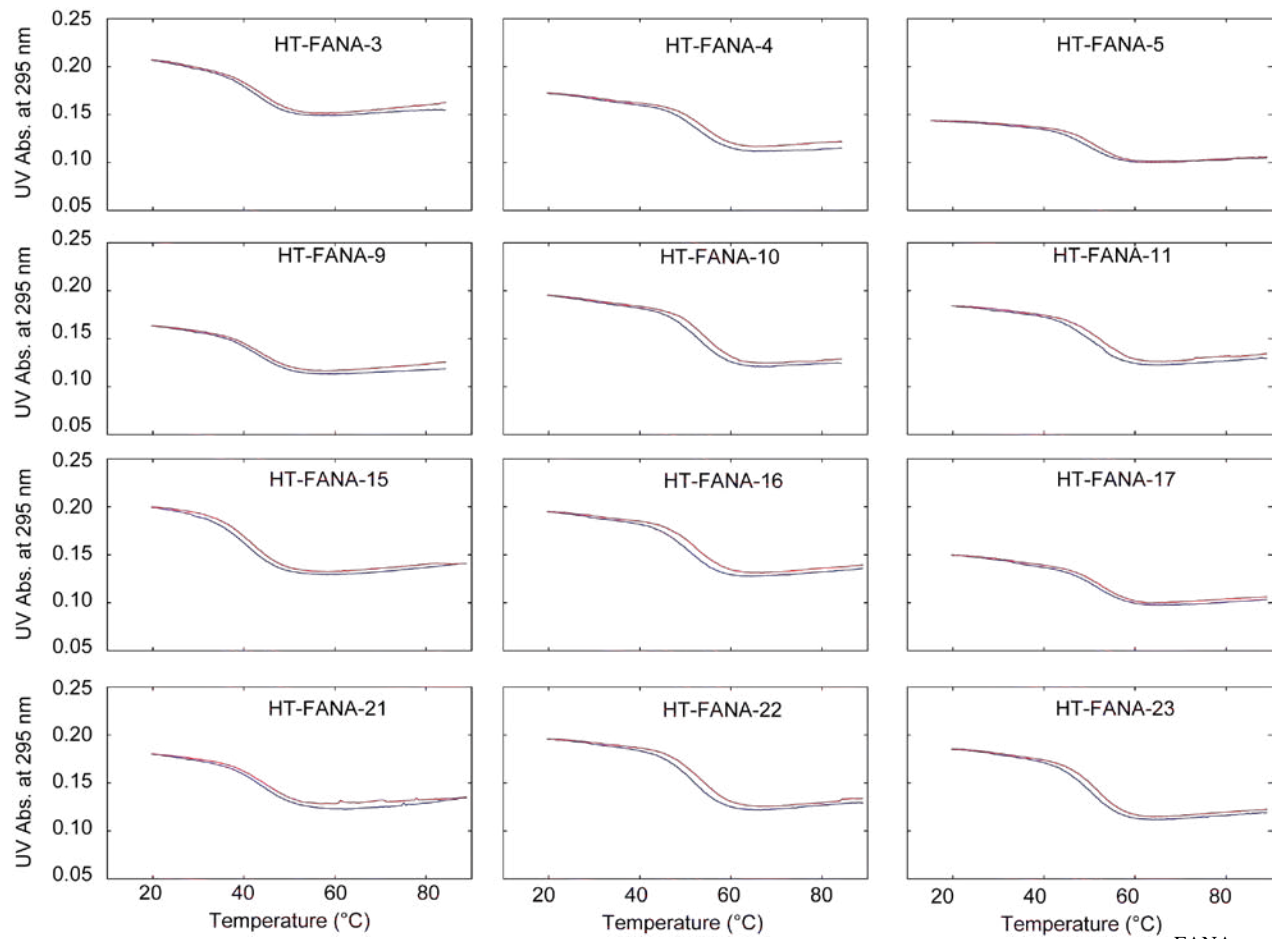

**Figure S19:** UV absorbance spectra at 295 nm of thermal denaturing experiments of <sup>FANA</sup>G-modified (solid line) HT-series sequences. Both heating (red) and cooling (blue) curves are shown.

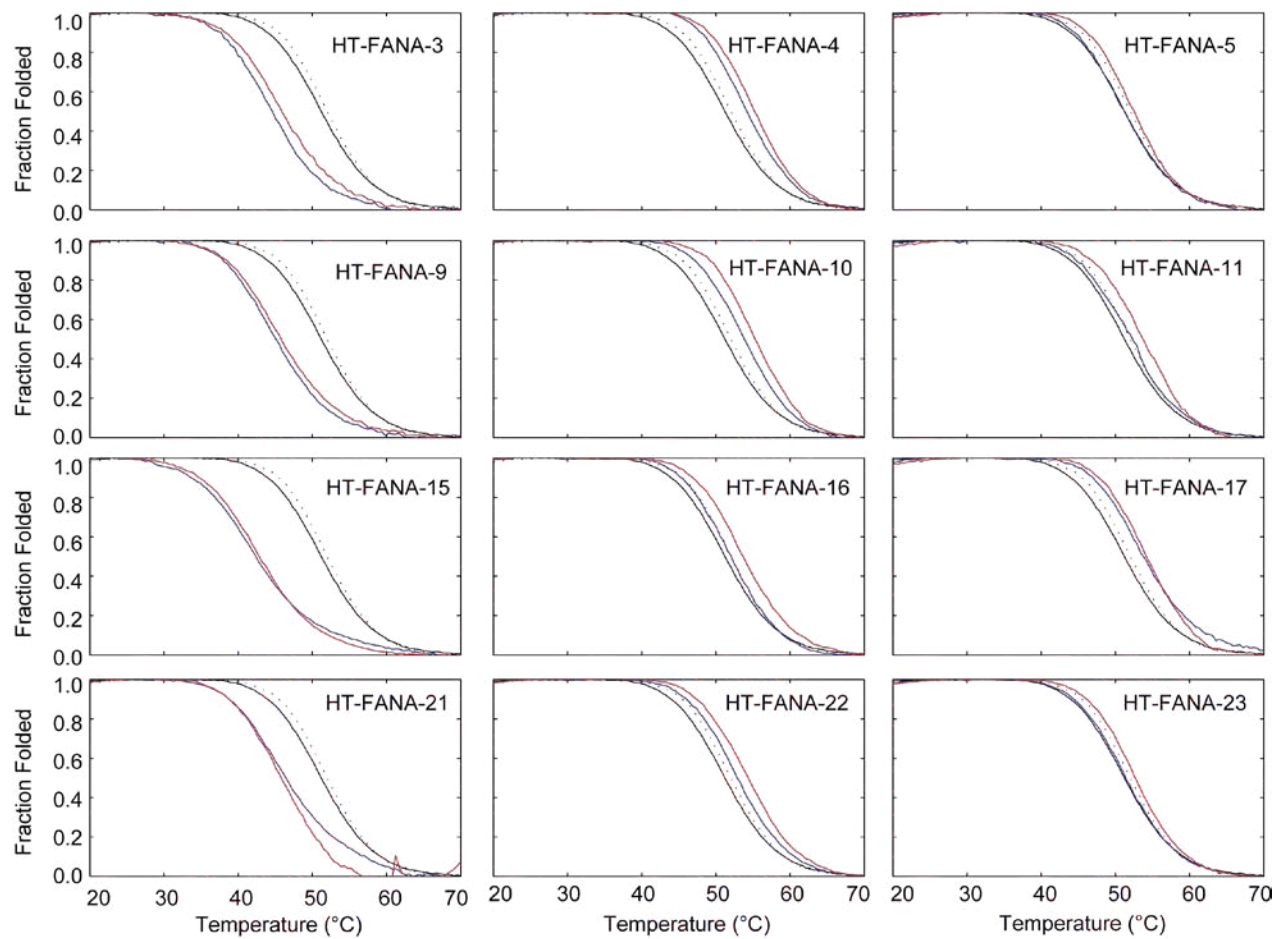

**Figure S20:** Fraction folded UV spectra of thermal denaturing experiments of <sup>FANA</sup>G-modified HT-series sequences. Heating (red) and cooling (blue) curves are shown. The native sequence (back line) is shown for reference



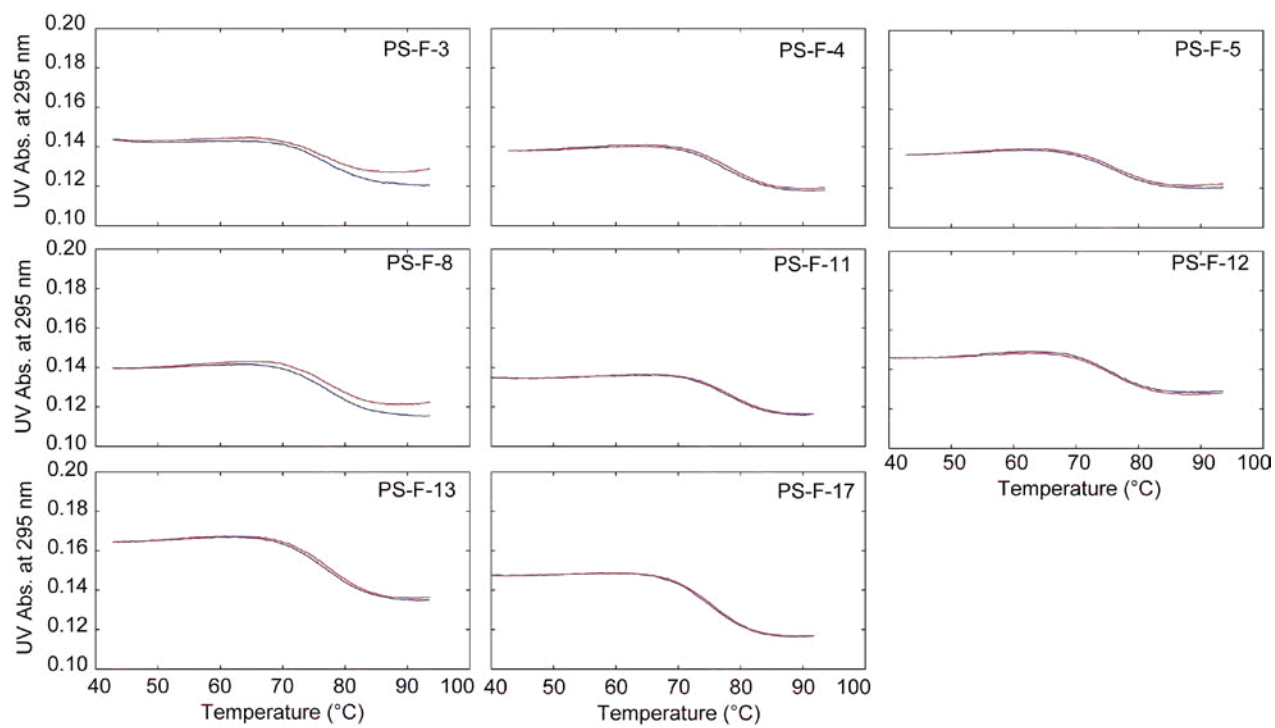

**Figure S21:** UV absorbance spectra at 295 nm of thermal denaturing experiments of <sup>F</sup>G-modified PS-series sequences. Both heating (red) and cooling (blue) curves are shown.

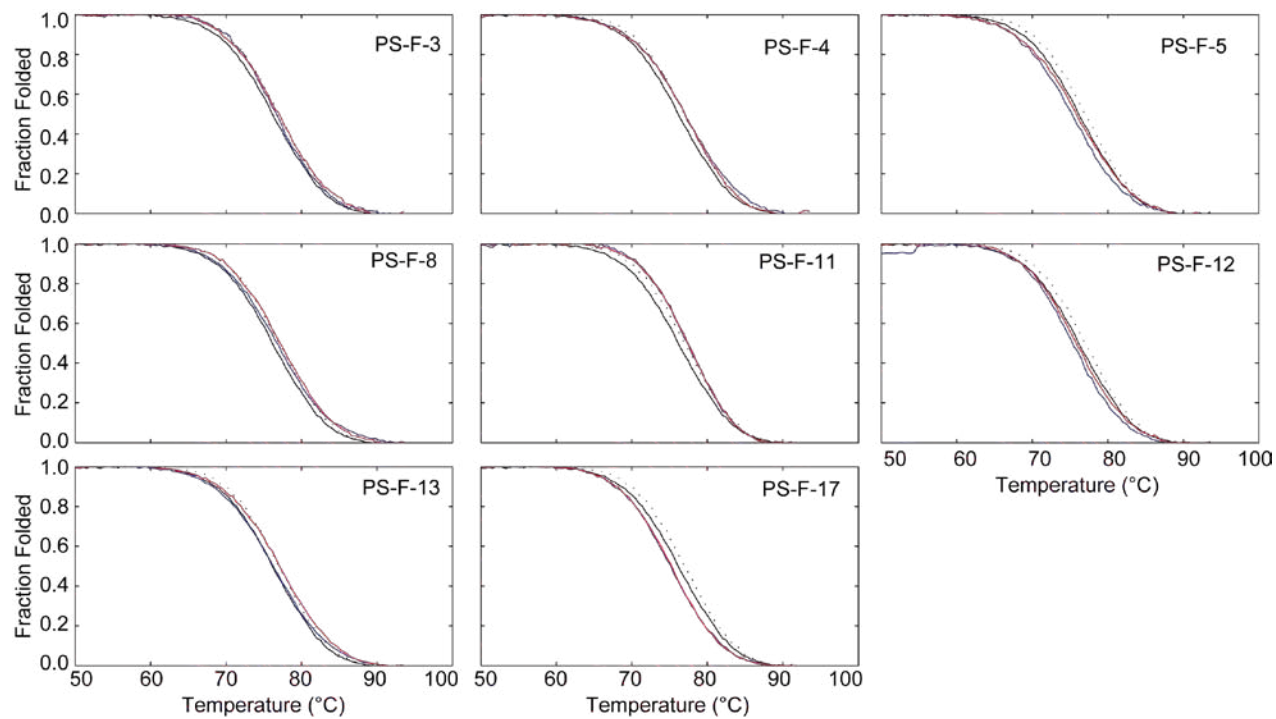

**Figure S22:** Fraction folded UV spectra of thermal denaturing experiments of <sup>F</sup>G-modified PS-series sequences. Heating (red) and cooling (blue) curves are shown. The native sequence (back line) is shown for reference

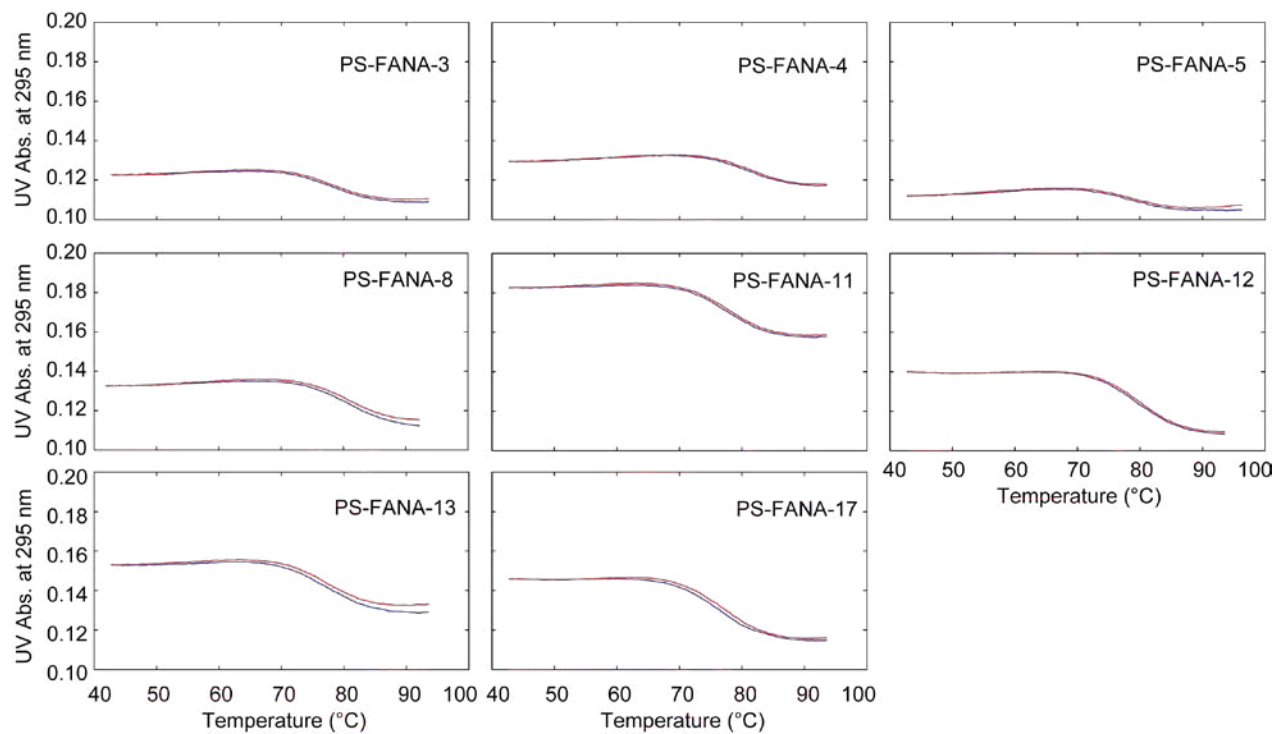

**Figure S23:** UV absorbance spectra at 295 nm of thermal denaturing experiments of <sup>FANA</sup>G-modified PS-series sequences. Both heating (red) and cooling (blue) curves are shown.

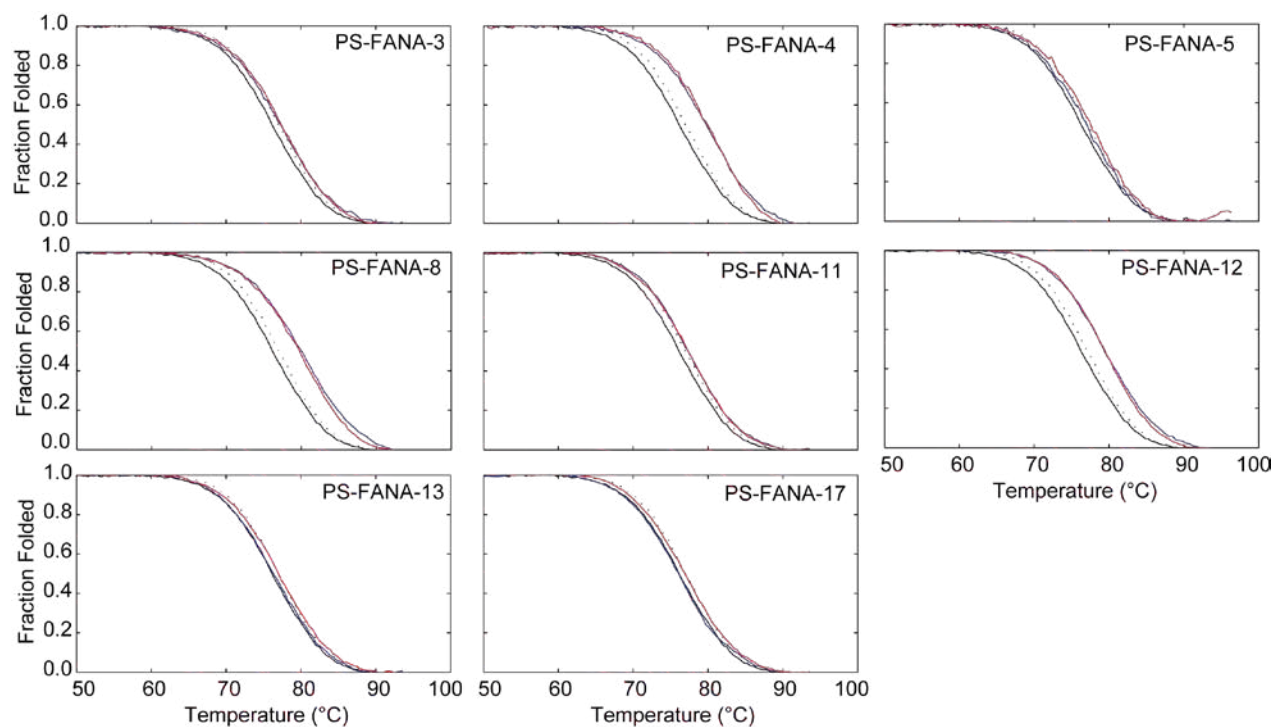

**Figure S24:** Fraction folded UV spectra of thermal denaturing experiments of <sup>FANA</sup>G-modified PS-series sequences. Heating (red) and cooling (blue) curves are shown. The native sequence (back line) is shown for reference
